# 1 **Genome-wide Analysis of Differential Transcriptional and** 2 **Epigenetic Variability Across Human Immune Cell Types**

3 Simone Ecker,<sup>1,2,\*</sup> Lu Chen,<sup>3,4</sup> Vera Pancaldi,<sup>1</sup> Frederik O. Bagger,<sup>4,5,6</sup> José María Fernández,<sup>1</sup> Enrique Carrillo de  
4 Santa Pau,<sup>1</sup> David Juan,<sup>1</sup> Alice L. Mann,<sup>3</sup> Stephen Watt,<sup>3</sup> Francesco Paolo Casale,<sup>6</sup> Nikos Sidiropoulos,<sup>7,8,9</sup> Nicolas  
5 Rapin,<sup>7,8,9</sup> Angelika Merkel,<sup>10</sup> BLUEPRINT Consortium, Henk Stunnenberg,<sup>11</sup> Oliver Stegle,<sup>6</sup> Mattia Frontini,<sup>4,5,12</sup> Kate  
6 Downes,<sup>4,5</sup> Tomi Pastinen,<sup>13</sup> Taco W. Kuijpers,<sup>14,15</sup> Daniel Rico,<sup>1,17</sup> Alfonso Valencia,<sup>1,17</sup> Stephan Beck,<sup>2,17</sup> Nicole  
7 Soranzo<sup>3,4,17,\*</sup> and Dirk S. Paul<sup>2,16,17,\*</sup>

8  
9 <sup>1</sup>Structural Biology and Biocomputing Programme, Spanish National Cancer Research Center (CNIO), Melchor Fernández Almagro 3, 28029 Madrid, Spain

10 <sup>2</sup>UCL Cancer Institute, University College London, 72 Huntley Street, London, WC1E 6BT, UK

11 <sup>3</sup>Department of Human Genetics, Wellcome Trust Sanger Institute, Wellcome Trust Genome Campus, Hinxton, Cambridge, CB10 1HH, UK

12 <sup>4</sup>Department of Haematology, University of Cambridge, Cambridge Biomedical Campus, Long Road, Cambridge, CB2 0PT, UK

13 <sup>5</sup>National Health Service (NHS) Blood and Transplant, Cambridge Biomedical Campus, Long Road, Cambridge, CB2 0PT, UK

14 <sup>6</sup>European Molecular Biology Laboratory, European Bioinformatics Institute, Wellcome Trust Genome Campus, Hinxton, Cambridge, CB10 1SD, UK

15 <sup>7</sup>The Finsen Laboratory, Rigshospitalet, Faculty of Health Sciences, University of Copenhagen, Ole Maaløes Vej 5, 2200, Copenhagen, Denmark

16 <sup>8</sup>Biotech Research and Innovation Centre (BRIC), University of Copenhagen, Ole Maaløes Vej 5, 2200, Copenhagen, Denmark

17 <sup>9</sup>The Bioinformatics Centre, Department of Biology, Faculty of Natural Sciences, University of Copenhagen, Ole Maaløes Vej 5, 2200, Copenhagen, Denmark

18 <sup>10</sup>National Center for Genomic Analysis (CNAG), Center for Genomic Regulation (CRG), Barcelona Institute of Science and Technology, Carrer Baldri i Reixac 4,  
19 08028 Barcelona, Spain

20 <sup>11</sup>Department of Molecular Biology, Radboud University, Faculty of Science, Nijmegen, 6525 GA, The Netherlands

21 <sup>12</sup>British Heart Foundation Centre of Excellence, University of Cambridge, Cambridge Biomedical Campus, Long Road, Cambridge, CB2 0PT, UK

22 <sup>13</sup>Department of Human Genetics, McGill University, 740 Dr. Penfield, Montreal, H3A 0G1, Canada

23 <sup>14</sup>Blood Cell Research, Sanquin Research and Landsteiner Laboratory, Plesmanlaan 125, Amsterdam, 1066CX, The Netherlands

24 <sup>15</sup>Emma Children's Hospital, Academic Medical Center (AMC), University of Amsterdam, Location H7-230, Meibergdreef 9, Amsterdam, 1105AX, The Netherlands

25 <sup>16</sup>Cardiovascular Epidemiology Unit, Department of Public Health and Primary Care, University of Cambridge, Strangeways Research Laboratory, Wort's  
26 Causeway, Cambridge, CB1 8RN, UK

27 <sup>17</sup>Co-senior authors

28  
29 \*Correspondence:

30 S. Ecker, [s.ecker@ucl.ac.uk](mailto:s.ecker@ucl.ac.uk)

31 N. Soranzo, [ns6@sanger.ac.uk](mailto:ns6@sanger.ac.uk)

32 D.S. Paul, [dsp35@medschl.cam.ac.uk](mailto:dsp35@medschl.cam.ac.uk)

---

33 **Abstract**

34 **Background:** A healthy immune system requires immune cells that adapt rapidly to environmental  
35 challenges. This phenotypic plasticity can be mediated by transcriptional and epigenetic  
36 variability.

37 **Results:** We applied a novel analytical approach to measure and compare transcriptional and  
38 epigenetic variability genome-wide across CD14<sup>+</sup>CD16<sup>-</sup> monocytes, CD66b<sup>+</sup>CD16<sup>+</sup> neutrophils,  
39 and CD4<sup>+</sup>CD45RA<sup>+</sup> naïve T cells, from the same 125 healthy individuals. We discovered  
40 substantially increased variability in neutrophils compared to monocytes and T cells. In  
41 neutrophils, genes with hypervariable expression were found to be implicated in key immune  
42 pathways and to associate with cellular properties and environmental exposure. We also observed  
43 increased sex-specific gene expression differences in neutrophils. Neutrophil-specific DNA  
44 methylation hypervariable sites were enriched at dynamic chromatin regions and active enhancers.

45 **Conclusions:** Our data highlight the importance of transcriptional and epigenetic variability for  
46 the neutrophils' key role as the first responders to inflammatory stimuli. We provide a resource to  
47 enable further functional studies into the plasticity of immune cells, which can be accessed from:  
48 <http://blueprint-dev.biinfo.cnio.es/WP10/hypervariability>.

49

50 **Keywords**

51 Differential variability, phenotypic plasticity, heterogeneity, immune cells, monocytes,  
52 neutrophils, T cells, gene expression, DNA methylation

---

## 53 **Background**

54 Phenotypic plasticity is fundamental to human immunity, allowing rapid cellular adaptation in  
55 response to changing environmental conditions [1]. Plasticity of immune cells can be influenced  
56 by the variability of cellular traits including gene expression and DNA methylation. The stochastic  
57 nature inherent to cellular processes such as gene regulation gives rise to cell-to-cell variation,  
58 enhancing survival under adverse conditions and stress [2–4]. Environmental stimuli including  
59 temperature, hormone levels, and invading pathogens further affect the expression of genes in a  
60 tissue- and temporal-dependent fashion [2,4,5].

61 Rapid and effective response to a stimulus is facilitated and intensified if the cellular trait  
62 already exhibits large stochastic fluctuations in the absence of the stimulus [3]. For example, while  
63 genes involved in stress response tend to be highly variable [3,6,7], genes involved in essential  
64 cellular functions, such as protein synthesis and metabolism, demonstrate less variable expression  
65 levels [8,9].

66 B and T cells utilize genetic recombination to generate a highly diverse repertoire of  
67 immunoglobulins and T cell surface receptors, respectively. In addition, immune responses are  
68 driven by the variability of key signaling molecules and transcription factors not controlled by  
69 genetic factors [10,11]. Epigenetic states, including DNA methylation, also contribute to plastic  
70 gene expression during cell fate commitment, thus enhancing fitness in response to external cues  
71 [12,13].

72 Transcriptional and epigenetic heterogeneity that is measured across individuals emerges from  
73 different origins. While intra-individual variability can relate to different cellular properties in  
74 response to external signals, such as cell activation and communication [3,7,14], inter-individual  
75 variability can relate to differences between the individuals, including genetic makeup, age, sex,

76 and lifestyle. Importantly, it has also been demonstrated that inter-individual variability can serve  
77 as an appropriate proxy for intra-individual variability at the level of single cells [7,14,15].

78 Both transcriptional and epigenetic variability have been shown to strongly correlate with the  
79 development and progression of human diseases [12,16,17]. For example, gene expression  
80 variability has been linked to human immunodeficiency virus (HIV) susceptibility [18],  
81 neurological disorders [18,19], and cancer [20,21]. Hypervariable DNA methylation loci can be  
82 used as biomarkers to predict the risk of neoplastic transformation in stages prior to neoplasia  
83 [22,23].

84 The extent and functional interpretation of transcriptional and epigenetic variability has not  
85 been systematically investigated genome-wide across multiple immune cell types in the general  
86 population. Here, we applied a novel analytical approach to measure differential variability of gene  
87 expression and DNA methylation in three major immune cell types: CD14<sup>+</sup>CD16<sup>-</sup> classical  
88 monocytes, CD66b<sup>+</sup>CD16<sup>+</sup> neutrophils, and CD4<sup>+</sup>CD45RA<sup>+</sup> ‘phenotypically naïve’ T cells. This  
89 matched panel of cell types was derived from the same 125 healthy individuals. We show that  
90 neutrophils exhibit substantially increased variability of both gene expression and DNA  
91 methylation patterns, compared to monocytes and T cells, consistent with these cells’ key role as  
92 the first line of host defense. We annotated hypervariable genes and CpGs to known homeostatic  
93 and pathogenic immune processes, and further found subsets of genes correlating with genetic  
94 makeup, donor demographic and lifestyle factors. Our data further reveal potential molecular  
95 mechanisms of immune responses to environmental stimuli, and provide a resource to enable  
96 future functional studies into the phenotypic plasticity of human immune cells in health and  
97 disease.

98

99

## 100 **Results**

### 101 **Deep molecular profiling of immune cells in the BLUEPRINT Human Variation Panel**

102 The analyses described in this study are based on the publicly available resource provided by the  
103 BLUEPRINT Human Variation Panel [24]. The resource contains genome-wide molecular  
104 profiles of CD14<sup>+</sup>CD16<sup>-</sup> classical monocytes, CD66b<sup>+</sup>CD16<sup>+</sup> neutrophils, and CD4<sup>+</sup>CD45RA<sup>+</sup>  
105 naïve T cells. These leukocyte types were chosen due to their important role in mediating immune  
106 cell processes, their relative abundance in peripheral blood allowing for examination of multiple  
107 cellular traits, as well as the availability of experimental protocols to prepare cell populations of  
108 high purity (>95%). Monocytes and neutrophils are myeloid cells that share the same bone-marrow  
109 residing granulocyte-macrophage precursor cell. Monocytes migrate to sites of infection and  
110 differentiate into macrophages and dendritic cells to induce an immune response. As part of the  
111 innate immune system, neutrophils move within minutes to sites of infection during the acute phase  
112 of inflammation. Naïve T cells are lymphoid cells that are part of the adaptive immune system,  
113 representing mature helper T cells that have not yet recognized their cognate antigen.

114 Across an initial cohort of 202 healthy individuals representative of the UK population, purified  
115 preparations of these primary cells were probed for gene expression using total RNA sequencing  
116 (RNA-seq) and DNA methylation using Illumina Infinium HumanMethylation450 BeadChips  
117 ('450K arrays'). Detailed information about the experimental and analytical strategies for  
118 quantifying these cellular traits are provided in the Methods section. Figures S1 and S2 give an  
119 overview of the data quality assessment of the gene expression and DNA methylation data sets,  
120 respectively. All individuals were further profiled for DNA sequence variation using whole-  
121 genome sequencing to allow for cell type-dependent, quantitative assessment of the genetic and  
122 epigenetic determinants of transcriptional variance [24].

123 In this study, we exploited this resource, selecting all 125 donors for whom matched gene  
124 expression and DNA methylation data sets were available across the three immune cell types. The  
125 key analytical advance of the work presented here concerns the measurement and interpretation of  
126 differential variability. That is, the identification of loci at which gene expression and DNA  
127 methylation levels show significantly greater variation within one cell type as compared to the  
128 other cell types. An overview of the study design and analytical concept is provided in Figure 1A.

129

### 130 **Genome-wide patterns of differential gene expression variability across immune cell types**

131 We first assessed inter-individual expression variability of 11,980 protein-coding, autosomal genes  
132 that showed robust expression in monocytes, neutrophils, and T cells (Methods). We applied an  
133 improved analytical approach for the assessment of differential variability (Methods), taking into  
134 account the strong negative correlation between mean gene expression levels and expression  
135 variability (Figure S3).

136 Figure 1B gives an overview of the number of identified hypervariable genes (HVGs) that are  
137 cell type-specific, shared between two, or common to all three of the studied immune cell types.  
138 Neutrophils were found to have the largest number of HVGs overall (n=1,862), as well as of cell  
139 type-specific HVGs (n=1,163). In contrast, we found only a small number of cell type-specific  
140 HVGs in monocytes and T cells (n=14 and n=3, respectively). In addition, we identified 271 genes  
141 that were highly variable across all three immune cell types using a rank-based approach  
142 (Methods). Mature neutrophils (as profiled here) show low proliferative capacity and reduced  
143 transcriptional and translational activity [25,26]. The latter could potentially impede comparable  
144 assessment of differential variability, if the relationship between variability and mean expression  
145 levels was not taken into account. Thus, using our analytical approach, we assessed and confirmed  
146 that overall reduced gene expression levels did not technically confound the observed increased  
147 variability of gene expression levels in neutrophils (Figure S3).

148 We then aimed to replicate the detected hypervariable gene levels in an independent sample  
149 cohort. We retrieved a gene expression data set generated using Illumina Human HT-12 v4  
150 Expression BeadChips consisting of CD16<sup>+</sup> neutrophils derived from 101 healthy individuals [27].  
151 Of the 11,023 gene probes assessed on the array platform, 6,138 could be assigned to a  
152 corresponding gene identifier in our data set. Neutrophil-specific hypervariable genes measured  
153 using RNA-seq were also found to be hypervariable using expression arrays in the independent  
154 cohort of healthy individuals (Figures 1C and 1D).

155 In summary, we devised and assessed a novel method for the identification of differential gene  
156 expression variability. Overall, we found strongly increased variability of gene expression in  
157 neutrophils compared to monocytes and T cells, and replicated the detected neutrophil-specific  
158 hypervariable gene patterns in an external cohort.

159

### 160 **Biological significance of differentially variable genes across immune cell types**

161 Next, we explored the characteristics of the identified hypervariable genes. We performed  
162 ontology enrichment analysis of gene sets using the Goseq algorithm [28]. This method takes into  
163 account the effect of selection bias in RNA-seq data that can arise due to gene length differences  
164 [28]. Table S1 and Table S2 summarize the annotation data of all identified HVGs and observed  
165 gene ontology enrichment patterns, respectively.

166 Genes showing expression hypervariability across all three cell types were enriched in  
167 biological processes related to chemotaxis, migration, and exocytosis (Table S2). For neutrophil-  
168 specific HVGs, we found gene ontology enrichment in oxidoreductase activity and cellular  
169 processes related to virus response and parasitism (Table S2). Notable genes among those with  
170 hypervariable expression values were *CD9* (Figure 2A), *CAPN2* (Figure 2B), and *FYN* (Figure  
171 2C). *CD9* showed increased variability across all three cell types. The gene encodes the CD9  
172 antigen, a member of the tetraspanin family. It functions as cell surface protein that forms

173 complexes with integrins to modulate cell adhesion and migration and mediate signal transduction  
174 [29,30]. The neutrophil-specific HVGs *CAPN2* and *FYN* encode a calcium-activated neutral  
175 protease involved in neutrophil chemotaxis [31] and a tyrosine-protein kinase implicated in  
176 intracellular signal transduction [32], respectively.

177 Taken together, functional enrichment of hypervariable gene sets revealed that many of the  
178 identified hypervariable genes are involved in mediating immune-related processes. This suggests  
179 that neutrophils exhibit specific gene loci that are highly adaptable to external cues.

180

### 181 **Determinants of inter-individual cell type-specific gene expression variability**

182 Following the discovery and characterization of genes that present hypervariable expression levels  
183 between individuals, we next aimed to delineate potential sources of heterogeneity that can be  
184 associated to differences between individuals. We hypothesized that these sources mainly relate to  
185 genetic variation, age, sex, and lifestyle factors.

186 First, we determined the subset of cell type-specific HVGs that correlated with genetic variants.  
187 We retrieved gene sets with a local (*cis*) genetic component designated by expression quantitative  
188 trait locus (eQTL) and variance decomposition analyses, as described in the BLUEPRINT Human  
189 Variation Panel (Figure S4A). In neutrophils, we found that 638 of the 1,163 cell-specific HVGs  
190 (55%) associate with *cis* genetic variants (Table S1), at least partly explaining the observed gene  
191 expression variability. These data are consistent with previous reports, highlighting the role of  
192 genetic variants in mediating transcriptional variance [33–35].

193 Second, we correlated cell type-specific HVGs with various quantitative traits measured in  
194 individual donors: demographic information (age, body mass index, and alcohol consumption);  
195 cellular parameters as assessed by a Sysmex hematology analyzer (e.g. cell count and size); and  
196 season (i.e. minimum/maximum temperature and daylight hours of the day on which blood was  
197 drawn). The results of this analysis are provided in Tables S1 and S3. In neutrophils, we identified



198 49 HVGs that show significant association with at least one of the measured traits (Figure 2D).  
199 For example, we found *NFXI*, a nuclear transcription factor that regulates *HLA-DRA* gene  
200 transcription [36], to associate with neutrophil granularity (Figure 2E). An increase in neutrophil  
201 granularity can be reflective of a potential infection; this parameter is routinely monitored in a  
202 clinical setting. *FYN* gene levels (reported above) were negatively correlated with neutrophil  
203 percentage (Figure 2F).

204 Third, we investigated whether sex was an important source of inter-individual (autosomal)  
205 gene expression variability. We found only two of the 1,163 neutrophil-specific HVGs to be  
206 differentially expressed between sexes, *SEPT4* and *TMEM63C* (Figure S5A), and high expression  
207 variability was observed for both sexes in these genes. However, in neutrophils we identified a  
208 surprisingly large number of sex-specific differentially expressed genes of small effect size, which  
209 corresponded to important immune cell functions. We present a detailed analysis of these genes  
210 below.

211 In conclusion, we found that genetic makeup was an important determinant of transcriptional  
212 variability. Donor demographic and lifestyle factors also contributed towards transcriptional  
213 variability.

214

### 215 **Neutrophil-specific hypervariable genes not mediated by *cis* genetic effects**

216 Next, we studied in detail the subset of neutrophil-specific genes that showed hypervariable  
217 expression but did not associate with local genetic variants (n=525). Although some of these genes  
218 could be mediated by distal (*trans*) genetic factors not detected in the BLUEPRINT Human  
219 Variation Panel, it is conceivable that expression heterogeneity of this gene set was primarily due  
220 to external triggers or stochastic fluctuations.

221 We generated a correlation matrix of expression levels of the 525 HVGs, and identified clusters  
222 of correlated genes that may act in concert or be co-regulated. The identified co-expression

223 network contained 259 connected genes, and consisted of three distinct gene modules (Figure 3).  
224 We inferred biological functions corresponding to the three gene modules. All modules were  
225 highly enriched for genes with important immune-related functions.

226 The first and largest gene module (n=105 genes, green color) showed enrichment for inclusion  
227 body, receptor signaling, and immune response activation. The second module (n=78 genes,  
228 yellow color) was enriched in biological processes related to RNA processing and chaperone  
229 binding. The third gene module (n=33 genes, red color), contained many genes with particularly  
230 high variation in their expression patterns. *RSAD2*, an interferon-inducible antiviral protein,  
231 showed highest variability, among many other interferon-inducible genes present in module three.  
232 These genes are essential in innate immune response to viral infections [37]. Gene ontology and  
233 pathway analyses of all genes in the network module further showed a strong enrichment for  
234 response to type I interferon, and several viral disease pathways including influenza A, herpes  
235 simplex, and hepatitis (Figure S6). A detailed functional annotation of all three network modules  
236 is provided in Table S4.

237

### 238 **Sex-specific differential gene expression across immune cell types**

239 In our analysis, we did not detect differences in mean gene expression levels between male and  
240 female donors with log-fold change  $\geq 1$  – albeit with two exceptions in neutrophils (Figure S5A).  
241 Nonetheless, when no minimum log-fold change criterion was applied, we found that sex-  
242 dependent mean expression of autosomal genes (Figure S5B) was highly abundant in neutrophils  
243 (n=3,357 genes), compared to T cells (n=895) and monocytes (n=64).

244 As many autoimmune diseases have a higher incidence in females, and females show generally  
245 elevated immune responses compared to males [38], we hypothesized that genes with elevated  
246 gene expression levels in females may account for the increased incidence rates. Indeed, genes  
247 with higher mean expression levels in neutrophils derived from females (n=682) were enriched in

248 immune response and related pathways (Table S5). In contrast, genes with increased mean  
249 expression in male donors (n=2,675) were enriched in basic cellular processes, such as RNA  
250 processing and translation (Table S5). In addition, in male donors, genes were strongly enriched  
251 in cellular compartments, such as nuclear lumen (Table S5).

252  
253 **Genome-wide patterns of differential DNA methylation variability across immune cell types**

254 Following the analyses of differential gene expression variability, we then applied our improved  
255 analytical approach to determine inter-individual variability of DNA methylation levels at 440,905  
256 CpG sites (Methods). Again, our method accounted for confounding effects due to the correlation  
257 between mean and variability measurements (Figure S7).

258 Concordant with our findings for gene expression variability (Figure 1B), we found that  
259 neutrophils had the largest number of hypervariable CpG positions (HVPs) overall (n=1,053), as  
260 well as cell-specific HVPs (n=261). Neutrophils and monocytes shared a considerable number of  
261 HVPs (n=380) in contrast to T cells (Figure 1E). Finally, we identified 212 HVPs common to all  
262 three cell types. An overview of the number of HVPs is shown in Figure 1E.

263 Following the discovery of HVPs, we examined whether these sites were overrepresented at  
264 particular gene elements and epigenomic features. To this end, we focused on cell type-specific  
265 HVPs, correlating their DNA methylation levels with distinct cellular characteristics and  
266 molecular pathways. In Table S6, we summarize the detailed annotation of all HVPs across the  
267 three profiled immune cell types. In neutrophils, we found that cell type-specific HVPs were  
268 depleted at CpG islands, which typically occur near transcription start sites ( $P = 6.37 \times 10^{-19}$ ,  
269 hypergeometric test; Figure 4A), and enriched at intergenic regions ( $P = 0.03$ ; Figure 4B).

270 We hypothesized that cell type-specific HVPs localize at distal gene regulatory elements such  
271 as enhancer sequences, of which many are known to be also cell type-specific [39]. To test this  
272 hypothesis, we retrieved reference chromatin state maps of primary human monocytes,

273 neutrophils, and T cells from the data repository provided by the BLUEPRINT Consortium  
274 [Carrillo de Santa Pau et al., BLUEPRINT Consortium, under revision]. Chromatin states are  
275 defined as spatially coherent and biologically meaningful combinations of multiple chromatin  
276 marks [40,41]. A total of five chromatin states were designated, which corresponded to  
277 functionally distinct genomic regions, namely active promoters, enhancers, and regions related to  
278 transcriptional elongation and polycomb-repression. In addition, a ‘variable’ chromatin state was  
279 defined here, indicating frequent changes of local chromatin structure across samples of the same  
280 cell type. Indeed, neutrophil-specific HVPs were found to be strongly enriched in the enhancer ( $P$   
281  $= 1.32 \times 10^{-12}$ , hypergeometric test; Figure 4C) and variable chromatin states ( $P = 3.81 \times 10^{-8}$ ; Figure  
282 4C).

283

#### 284 **Biological significance of immune cell type-specific hypervariable CpGs**

285 To interpret the potential cellular and biological implications of cell type-specific hypervariable  
286 CpGs, we annotated the genes in close proximity to each CpG using the Genomic Regions  
287 Enrichment of Annotations Tool (GREAT) [42]. This tool is valuable in assigning putative  
288 functions to sets of non-coding genomic regions [42].

289 Overall, we found enrichment in gene ontology terms attributed to genes close to HVPs in a  
290 cell type-dependent context (Table S7). For example, genes located near neutrophil-specific HVPs  
291 were enriched in gene signatures related to acute *Streptococcus pneumoniae* infection and cysteine  
292 synthase activity; the latter molecular process is important to hold off infections [43]. Consistent  
293 with established neutrophil function, this suggests that the identified HVPs play a role in regulating  
294 the expression of neutrophil-specific genes in response to infection.

295 In Figure 4D, we provide an example of a neutrophil-specific HVP at the promoter of the  
296 *ITGB1BP1* gene, encoding the integrin beta 1 binding protein 1. Integrins are essential cell  
297 adhesion proteins that induce intracellular signaling pathways upon activation by matrix binding

298 [44,45]. They function as signal transducers allowing for rapid responses to cell surface signals  
299 [45]. Notably, the highlighted HVP mapped to a variable chromatin state at this locus, indicating  
300 that it influences local chromatin dynamics upon an internal or external trigger (Figure 4D).

301 In conclusion, we showed that cell type-specific HVPs clustered in enhancer and dynamic  
302 chromatin states at intergenic regions, suggesting they play a role in the regulation of cell type-  
303 specific gene expression programs in response to environmental changes. Genes in proximity to  
304 HVPs were enriched in gene sets relevant to important immunological functions.

305

### 306 **Determinants of inter-individual cell type-specific DNA methylation variability**

307 Subsequent to the identification and annotation of CpGs with hypervariable DNA methylation  
308 levels, we explored potential reasons for the discovered inter-individual DNA methylation  
309 heterogeneity.

310 In agreement with our findings for gene expression variability, we determined that a large  
311 proportion of cell type-specific HVPs correlated with *cis* genetic variants reported in the  
312 BLUEPRINT Human Variation Panel (Figure S4B). In neutrophils, we found that 167 of the 261  
313 cell type-specific HVPs (64%) associated with DNA methylation quantitative trait loci (Table S6).  
314 Our data further revealed that none of the cell type-specific HVPs were differentially methylated  
315 between male and female donors. The complete numerical results of all correlation analyses are  
316 provided in Table S8.

317 HVPs specific to monocytes showed frequent association with seasonal effects, such as  
318 temperature and daylight (n=12/117 HVPs; Figure S8). This finding is consistent with recent  
319 analyses reporting fluctuations of gene expression levels in monocytes depending on season and  
320 circadian rhythm [46]. Many CD4<sup>+</sup> T cell-specific HVPs particularly correlated with donor age  
321 (n=14/46 HVPs; Figure S8), in line with previous findings on age-related DNA methylation  
322 changes in T cells [47,48]. These alterations are especially interesting in the context of

323 immunosenescence, for which dysregulation in T cell function is thought to play a crucial role  
324 [49,50]. Naïve CD4<sup>+</sup> T cells have further been reported to become progressively longer-lived with  
325 increasing age [51], which possibly also impacts their DNA methylation patterns.

326

### 327 **Correlation of DNA methylation variability with transcriptional output**

328 DNA methylation at active gene elements can directly control the regulation of gene expression.  
329 While methylated gene promoters usually lead to transcriptional silencing, methylated gene bodies  
330 typically lead to transcriptional activation [52]. We next aimed to probe this paradigm in the  
331 context of gene expression and DNA methylation variability.

332 We measured the correlation of DNA methylation variability with transcriptional output at the  
333 level of single genes. Specifically, we studied cell type-specific HVPs that map to gene promoters  
334 and bodies, correlating their DNA methylation level with the gene expression level in the same  
335 individuals. At promoters, 30.1% (range, 23.5–33.3%) of HVPs showed a negative correlation  
336 with gene expression (Figure 5A), in support of the conventional role of DNA methylation in gene  
337 repression. At gene bodies, a small subset of HVPs (5.0%; range, 0.0–10.8%) showed a positive  
338 correlation with gene expression (Figure 5B). Table S9 gives a full account of these genes and  
339 numeric results.

340 An example is provided in Figure 5C, showing a monocyte-specific HVP at the gene promoter  
341 of *MSRI*. At this CpG site, DNA methylation levels were significantly correlated with gene  
342 repression (BH-corrected  $P < 2.2 \times 10^{-16}$ , Spearman's rank correlation). *MSRI*, encoding the CD204  
343 antigen, is involved in endocytosis of modified low-density lipoproteins.

344

### 345 **Relationship between DNA methylation variability and gene expression variability**

346 Finally, we examined global patterns of DNA methylation variability in relation to transcriptional  
347 variability. In neutrophils, highly variable gene expression levels were observed at promoters

348 exhibiting highly variable DNA methylation levels, and also at promoters showing very stable  
349 DNA methylation levels (Figure 5D). For DNA methylation variability at gene bodies, this  
350 relationship was weaker and showed a linear tendency (Figure 5E). Importantly, these global  
351 patterns were consistent across all three immune cell types (Figure S9).

352 To characterize these promoter regions further, we counted the number of transcription factor  
353 binding motifs at these regions (Methods). We found an accumulation of binding motifs at  
354 promoters presenting either highly variable or very stable DNA methylation levels (Figure 5F and  
355 S8). Next, we explored the properties of the 100 genes that showed both the highest expression  
356 variability and the highest DNA methylation variability at their promoters. We found that of the  
357 100 genes in each cell type, 66 were common to all three cell types; in turn, 10 of these 66 genes  
358 encode transcription factors. For example, in neutrophils this included *ELF1*, a transcriptional  
359 regulator of genes involved in immune response signaling pathways [53]. Neutrophil-specific  
360 HVGs were also enriched at genes with promoter sequences that contain the consensus binding  
361 motif of *ELF1* (BH-corrected  $P = 1.2 \times 10^{-5}$ ; MSigDB analysis).

362 Taken together, these results provide evidence that DNA methylation variability and gene  
363 expression variability could be mediated by the sequence-specific binding of transcription factors,  
364 such as *ELF1* in neutrophils. Future studies will be required to further investigate the functional  
365 relevance of the observed correlation.

366

## 367 **Discussion**

368 In this study, we investigated the transcriptional and epigenetic variability that enables immune  
369 cells to rapidly adapt to environmental changes. To this end, we devised a novel analytical strategy  
370 to assess inter-individual variability of gene expression and DNA methylation as a measure of  
371 functional plasticity across three immune cell types.

372 A key insight from our integrative analyses is that neutrophils exhibit substantially increased  
373 variability of both gene expression and DNA methylation compared to monocytes and T cells  
374 (Tables S1 and S6). In neutrophils, genes with important functions in intracellular signaling, cell  
375 adhesion, and motility showed increased variability (Tables S2 and S7). Importantly, a subset of  
376 these genes were found to be under epigenetic control, such as *RSAD2*, a gene involved in  
377 interferon-mediated immune response (Figure 3). Neutrophils play a diverse role in innate immune  
378 defense and act as effector cells of adaptive immunity. They use multiple sophisticated molecular  
379 mechanisms to locate and contain pathogens, including phagocytosis, degranulation, and NETosis,  
380 i.e. the generation of neutrophil extracellular traps, NETs [54,55]. The phenotypic and functional  
381 heterogeneity of neutrophils has recently been recognized [56]. Here, we add to these data,  
382 providing evidence that increased variability of gene expression and DNA methylation relate to  
383 functional diversity and effective adaptability during homeostatic and potentially pathogenic  
384 immune processes.

385 For our analyses we exploited the unique resource provided by the BLUEPRINT Human  
386 Variation Panel [24], enabling us to conduct the most comprehensive study of molecular variability  
387 in primary cell types to date. It allowed us to perform systematic, paired analyses across cell types  
388 and individuals, thus accounting to a large extent for potential differences related to sample  
389 processing and donor characteristics. However, we acknowledge that it is not possible to rule out  
390 a role for other confounding factors: Heterogeneity may also be partly explained by differing stages  
391 and rates of cell activation and cell death during experimental processing, as well as unaccounted  
392 environmental effects such as circadian rhythm, diet, physical activity, and psychological stress,  
393 which could affect one cell type more than the other(s).

394 Differences in the proportions of cellular subpopulations may contribute to overall elevated  
395 variability between individuals. We have thus assessed the expression profiles of a number of  
396 genes that identify distinct cellular subpopulations of neutrophils [56]: *CXCR4*, *CD63*, *CD62L*



397 (also known as *SELL*), and *CD49* (also known as *ITGA4*). We did not observe inter-individual  
398 gene expression differences of surface markers corresponding to known neutrophil  
399 subpopulations, with the exception of *CD49* (Figure S10). We note that *CD49* gene expression  
400 levels did not correlate with neutrophil granularity (BH-corrected  $P = 0.89$ , Spearman's rank  
401 correlation). These data suggest that variation in neutrophil subpopulations is unlikely to be a main  
402 determinant of increased inter-individual variability. Future studies are required to corroborate  
403 these results and to determine whether uncharacterized cellular subpopulations may contribute to  
404 the observed heterogeneity. Novel transcriptome and epigenome profiling techniques investigating  
405 gene expression and DNA methylation variability at the level of single cells will provide valuable  
406 additional information [57–59].

407 We have prepared all data sets generated in this study as an easily accessible and freely available  
408 online resource, comprising all results that showed statistical significance ( $n=3,378$ ) [60]. The  
409 portal is aimed to enable the research community to mine all results generated by our analyses and  
410 to conduct follow-up research into the plasticity of immune cells. In such studies, hypervariable  
411 gene-phenotype associations (Tables S3 and S8) can be further characterized using experimental  
412 approaches. For example, gene expression and DNA methylation hypervariability could be  
413 correlated to pathophysiological triggers of immune responses, such as interferon- $\gamma$  and  
414 lipopolysaccharide [61].

415

## 416 **Conclusions**

417 We found that neutrophils show increased variability in both their gene expression and DNA  
418 methylation patterns compared to monocytes and T cells. Our data suggest that increased  
419 variability in neutrophils may lead to cellular plasticity, enabling rapid adaptation to new or  
420 changing environments such as inflammation and pathogen intrusion. A detailed molecular

421 understanding of the role of cellular heterogeneity in the human immune system is crucial to  
422 specifically target a pathogenic cellular subset without compromising immunity, ultimately  
423 advancing therapeutic design and treatment strategies in hematopoietic and immunological  
424 diseases.

425

## 426 **Methods**

### 427 **Sample collection and cell isolation**

428 As part of the BLUEPRINT Human Variation Panel, a total of 202 healthy blood donors were  
429 recruited from the Cambridge NIHR BioResource [62]. Sample material was obtained at the NHS  
430 Blood and Transplant Centre in Cambridge (UK) with informed consent (REC 12/EE/0040).  
431 Donors were on average 55 years of age (range, 20–75 years) and 46% of donors were male. Blood  
432 was processed within three hours of collection. Whole blood was used to purify CD14<sup>+</sup>CD16<sup>-</sup>  
433 monocytes, CD66b<sup>+</sup>CD16<sup>+</sup> neutrophils, and naïve CD4<sup>+</sup>CD45RA<sup>+</sup> T cells using a multistep  
434 purification strategy. The purity of each cell preparation was assessed by multi-color fluorescence-  
435 activated cell sorting (FACS). Purity was on average 95% for monocytes, 98% for neutrophils,  
436 and 93% for CD4<sup>+</sup> T cells. Purified cell aliquots were pelleted, stored at -80°C, and transported to  
437 the processing institutes. Further details about the experimental protocols and quality control  
438 assessments are provided by the BLUEPRINT Human Variation Panel [24].

439

### 440 **RNA-sequencing assay and data preprocessing**

441 RNA-seq sample preparation and library creation were performed for monocytes and neutrophils  
442 at the Max Planck Institute for Molecular Genetics (Germany), and for T cells at McGill University  
443 (QC, CA). Purified cell aliquots were lysed and RNA extracted using TRIZOL reagent (Life  
444 Technologies) following the manufacturer's protocol. Sequencing libraries were prepared using a

445 TruSeq Stranded Total RNA Kit with Ribo-Zero Gold (Illumina). Adapter-ligated libraries were  
446 amplified and indexed via PCR. Libraries were sequenced using 100 bp single-end reads for  
447 monocytes and neutrophils, and paired-end reads for T cells. Reads from each RNA-seq library  
448 were assessed for duplication rate and gene coverage using FastQC [63]. Then, PCR and  
449 sequencing adapters were trimmed using Trim Galore. Trimmed reads were aligned to the  
450 GRCh37 reference genome using STAR [64]. We used GENCODE v15 to define the annotated  
451 transcriptome. Read counts of genes and exons were scaled to adjust for differences in total library  
452 size using DESeq2 [65]. Then, we applied ComBat [66] to correct for batch effects. An overview  
453 of the RNA-seq data quality assessment is provided in Figure S1.

454

#### 455 **Quantification of gene expression**

456 Analyses on RNA-seq data were performed on exon-based read counts per gene. We omitted all  
457 genes not expressed in at least 50% of all samples in each of the three cell types, leaving only  
458 genes that were robustly expressed in all three cell types. In addition, we included only protein-  
459 coding genes, resulting in a final set of 11,980 genes. RNA-seq read counts were converted into  
460 expression log counts by applying the formula  $\log_2(x+1)$ .

461

#### 462 **Illumina Infinium HumanMethylation450 assay and data preprocessing**

463 For monocytes and neutrophils, cell lysis and DNA extraction were performed at the University  
464 of Cambridge (UK), followed by bisulfite conversion and DNA methylation profiling at University  
465 College London (UK). T cells were processed at McGill University (QC, CA). DNA methylation  
466 levels were measured using Infinium HumanMethylation450 assays (Illumina) according to the  
467 manufacturer's protocol. All 450K array data preprocessing steps were carried out using  
468 established analytical methods incorporated in the R package minfi [67]. First, we performed  
469 background correction and dye-bias normalization using NOOB [68], followed by normalization

470 between Infinium probe types with SWAN [69]. Next, we filtered out probes based on the  
471 following criteria: (1) median detection  $P \geq 0.01$  in one or more samples; (2) bead count of less  
472 than three in at least 5% of samples; (3) mapping to sex chromosomes; (4) ambiguous genomic  
473 locations [70]; (5) non-CG probes; and (6) containing SNPs ( $MAF \geq 0.05$ ) within 2 bp of the  
474 probed CG. Finally, we adjusted for batch effects using an empirical Bayesian framework [66], as  
475 implemented in the ComBat function of the R package SVA [71]. An assessment of the DNA  
476 methylation data quality is shown in Figure S2.

477

### 478 **Quantification of DNA methylation**

479 The final data set that passed quality control consisted of 440,905 CpG sites. DNA methylation  
480 values were represented as either M-values or  $\beta$ -values. The methylation M-value is the  $\log_2$ -ratio  
481 of the intensities of the methylated probe versus the unmethylated probe on the 450K array, while  
482 the  $\beta$ -value is the ratio of the methylated probe intensity and the overall intensity. All analyses of  
483 DNA methylation data were performed using M-values. Due to their easier interpretability (i.e. 0–  
484 100% DNA methylation),  $\beta$ -values were used for the visualization of DNA methylation data in  
485 most figures.

486

### 487 **Analysis of differential variability**

488 To assess differential variability across the three cell types, we applied a combined statistical  
489 approach based on DiffVar [72], which is embedded in the framework of limma [73,74]. DiffVar  
490 calculates the median absolute deviation from the group mean (MAD) of expression levels of a  
491 particular gene, or DNA methylation at a given CpG site, across all individuals for two conditions,  
492 e.g. two distinct cell types. Then, a moderated t-test is used to test for a significant increase or  
493 decrease in MAD-value between the two conditions. However, we found that the MAD variability  
494 measurement employed by DiffVar is correlated with mean levels (Figures S3 and S7), which

495 could potentially confound the assessment of variability. Therefore, we included an additional  
496 measurement of variability that corrects for the dependency of variability measurements on the  
497 mean [8], here referred to as EV (gene expression variability value) and MV (DNA methylation  
498 variability value). The corresponding algorithm models variance as a function of the mean, and  
499 then calculates the ratio of the observed variance to expected variance in order to get a variability  
500 measurement independent of the mean. Differential variability was tested in three group-wise  
501 comparisons. Statistical significance was defined as BH-corrected [75]  $P < 0.05$  and EV/MV  
502 difference  $\geq 10\%$  relative to the observed range of EV-/MV-values. For each cell type, both  
503 contrasts in which the cell type is involved were considered to define statistically significant  
504 differential variability. For example, for a gene to be a neutrophil-specific HVG, it must show  
505 significantly increased variability in both the comparison versus monocytes and versus T cells. For  
506 a gene to be classified as hypervariable across two cell types (shared hypervariability), it must  
507 exhibit significantly increased variability in the two corresponding cell types, but low variability  
508 in the third. Thus, no gene can appear in more than one list. The statistical tests were performed in  
509 a paired fashion, taking into account that all three cell types were derived from the same  
510 individuals. This procedure corrects for potential differences related to individuals and sample  
511 processing.

512

### 513 **Analysis of variability common to all three cell types**

514 To identify HVGs common to all three cell types, we applied a rank-based approach. We ordered  
515 both MAD- and EV-values of all genes in the three cell types from high to low variability, and  
516 then took the top n genes with highest variability across all three cell types, where n corresponds  
517 to the mean number of results obtained for the gene lists of differential variability. Specifically,  
518  $n=271$  for gene expression variability, and  $n=212$  for DNA methylation variability.

519

---

## 520 **Gene set enrichment analyses**

521 For HVGs, we applied GSeq using the default parameters, and set ‘use\_genes\_without\_cat’ =  
522 FALSE, thus ignoring genes without an annotated category for the calculation of  $P$ -values [28].  
523 With regards to HVPs, we analyzed the biological functions of flanking genes with GREAT [42]  
524 using the standard parameters: association rule = basal + extension (constitutive 5 kb upstream,  
525 1 kb downstream, up to 1 Mb extension); curated regulatory domains = included. In both analyses  
526 we used the set of analyzed features as background, and the cutoff for statistical significance was  
527 set at BH-corrected  $P < 0.25$ .

528

## 529 **Gene co-expression network and pathway analysis**

530 For neutrophil-specific HVGs not associated with *cis* genetic variants in the BLUEPRINT Human  
531 Variation Panel, we first constructed a co-regulation network by calculating gene expression  
532 correlations. The threshold of gene correlations was set at Pearson’s  $r > 0.6$ . Unconnected genes  
533 were removed. The resulting correlation network was then further analyzed using Cytoscape [76].  
534 Clusters were identified by the agglomerative clustering method FAG-EC [77] of the ClusterViz  
535 plugin. Enrichment analyses of resulting gene clusters were performed using clueGO [78], setting  
536 the Kappa score to 0.4 and the cutoff for statistical significance at BH-corrected  $P < 0.05$ . All  
537 networks were visualized using Gephi [79].

538

## 539 **Correlation analyses**

540 Associations between both gene expression and DNA methylation levels with donor-specific  
541 quantitative traits, cellular parameters, as well as weather and seasonal effects were assessed by  
542 calculating Spearman’s rank correlation coefficients ( $\rho$ ) and their corresponding  $P$ -values.  
543 Results were considered statistically significant at BH-corrected  $P < 0.05$ . This threshold was also  
544 used for the correlation analyses between DNA methylation and gene expression data.

---

## 545 **Analyses of seasonal effects**

546 We downloaded historical raw weather data for the minimum and maximum daily temperature in  
547 London Heathrow (UK) for the period of data collection from the National Climatic Data Centre  
548 (USA) [80]. We applied linear interpolation to account for missing values. Additionally, we  
549 downloaded daylight hours for London [81]. The obtained data were then correlated with gene  
550 expression and DNA methylation values corresponding to the date of blood donation using  
551 Spearman's rank correlation coefficient (see details above).

552

## 553 **Analyses of sex-specific differential gene expression**

554 In each cell type, mean gene expression and DNA methylation differences between male and  
555 female donors were identified using limma [73,74]. A moderated t-test was performed and  
556 statistical significance defined as BH-corrected  $P < 0.05$  and log-fold change  $\geq 1$ . Results could be  
557 driven by differences in menopause status between female donors. Therefore, we performed the  
558 same analysis on only the subset of donors whom are younger than 50 years, and obtained very  
559 similar results compared to the complete donor group.

560

## 561 **Functional annotation of hypervariable CpGs**

562 For the enrichment analyses with regards to gene elements and epigenomic features, we used the  
563 annotation provided by the Illumina 450K array manifest. Enrichment was assessed by repeated  
564 random sampling ( $n=1,000$ ) using all probes that passed quality control ( $n=440,905$ ).

565

## 566 **Transcription factor motifs analysis at gene promoter regions**

567 Consensus transcription factor binding motifs were retrieved from the database  
568 'JASPAR\_CORE\_2016 \_vertebrates.meme' [82]. Using FIMO [83], we scanned for transcription

569 factor binding motifs ( $P < 1 \times 10^{-5}$ ) at promoter regions, defined as  $\pm 500$  bp around the transcription  
570 start site of genes listed in the reference gene set ‘UCSC.hg19.knownGene’.

571

## 572 **Programming language**

573 If not indicated otherwise, analyses were performed using R v3 (R Development Core Team, 2008)  
574 and Bioconductor [84].

575

## 576 **List of Abbreviations**

577 HIV, human immunodeficiency virus; RNA-seq, RNA sequencing; HVG, hypervariable gene;  
578 HVP, hypervariable CpG position; FACS, fluorescence-activated cell sorting; MAD, median  
579 absolute deviation; EV, gene expression variability value; MV, DNA methylation variability  
580 value.

581

## 582 **Declarations**

### 583 **Ethics approval and consent to participate**

584 All sample material was obtained at the NHS Blood and Transplant Centre in Cambridge (UK)  
585 with informed consent (REC 12/EE/0040).

586

### 587 **Consent for publication**

588 Not applicable.

589

590

591

592



---

593 **Availability of data and materials**

594 All data sets generated as part of this study are available at the European Genome-phenome  
595 Archive (EGA) [85] under the following accession numbers: EGAS00001001456 for 450K array  
596 data; EGAS00001000752 and EGAS00001000327 for RNA-seq data.

597

598 **Competing interests**

599 P. Flicek is a member of the Scientific Advisory Board for Omicia, Inc.

600

601 **Funding**

602 This work was funded by the EU-FP7 Project BLUEPRINT (HEALTH-F5-2011-282510).

603

604 **Authors' Contributions**

605 S. Ecker and D.S. Paul designed the study. S. Ecker, D.S. Paul, L. Chen, V. Pancaldi, F.O. Bagger,  
606 E. Carrillo de Santa Pau, D. Juan, N. Sidiropoulos, N. Rapin, and A. Merkel analyzed data. All  
607 other authors provided samples or analytical tools. D.S. Paul and S. Ecker wrote the manuscript.  
608 D. Rico, A. Valencia, S. Beck, N. Soranzo, and D.S. Paul supervised the study. All authors read  
609 and approved the final manuscript.

610

611 **Acknowledgments**

612 We would like to thank K. Pearce and M. Kristiansen (UCL Genomics) for processing the Illumina  
613 Infinium HumanMethylation450 BeadChips; D. Balzereit, S. Dökel, A. Kovacovics, and M.  
614 Linser (Max Planck Institute for Molecular Genetics) for help with generating the RNA-seq data;  
615 B. Phipson (Murdoch Childrens Research Institute) and H.C. Bravo (University of Maryland) for  
616 advice on statistical analyses; C. Bock (CeMM Research Center for Molecular Medicine of the

617 Austrian Academy of Sciences) for useful discussions; A. Orozco (University of Costa Rica) for  
618 technical support; V. Naranbhai, B. Fairfax, and J. Knight (University of Oxford) for providing  
619 access to the neutrophil gene expression data set for replication; and L. Phipps for proofreading  
620 the manuscript. We gratefully acknowledge the participation of all NIHR Cambridge BioResource  
621 volunteers, and thank the Cambridge BioResource staff for their help with volunteer recruitment.  
622 We thank members of the Cambridge BioResource SAB and Management Committee for their  
623 support of our study and the NIHR Cambridge Biomedical Research Centre for funding. S. Ecker  
624 is supported by a “la Caixa” pre-doctoral fellowship. V. Pancaldi is supported by a FEBS Long-  
625 Term Fellowship. F.O. Bagger is supported by The Lundbeck Foundation. K. Downes is funded  
626 as a HSST trainee by NHS Health Education England. M. Frontini is supported by the BHF  
627 Cambridge Centre of Excellence (RE/13/6/30180). S. Beck acknowledges support from the  
628 Wellcome Trust (WT99148), a Royal Society Wolfson Research Merit Award (WM100023), and  
629 the EU-FP7 Project EPIGENESYS (257082). N. Soranzo’s research is supported by the Wellcome  
630 Trust (WT098051 and WT091310), EU-FP7 Project EPIGENESYS (257082), and NIHR BRC.

631 BLUEPRINT Consortium: Cornelis A. Albers (Radboud University), Vyacheslav  
632 Amstislavskiy (Max Planck Institute for Molecular Genetics), Sofie Ashford (University of  
633 Cambridge), Lorenzo Bomba (Wellcome Trust Sanger Institute), David Bujold (McGill  
634 University), Frances Burden (University of Cambridge), Stephan Busche (McGill University),  
635 Maxime Caron (McGill University), Shu-Huang Chen (McGill University), Warren A. Cheung  
636 (McGill University), Laura Clarke (European Bioinformatics Institute), Irina Colgiu (Wellcome  
637 Trust Sanger Institute), Avik Datta (European Bioinformatics Institute), Oliver Delaneau  
638 (University of Geneva), Heather Elding (Wellcome Trust Sanger Institute), Samantha Farrow  
639 (University of Cambridge), Diego Garrido-Martín (Centre for Genomic Regulation), Bing Ge  
640 (McGill University), Roderic Guigo (Centre for Genomic Regulation), Valentina Iotchkova  
641 (European Bioinformatics Institute), Kousik Kundu (Wellcome Trust Sanger Institute), Tony

642 Kwan (McGill University), John J. Lambourne (University of Cambridge), Ernesto Lowy  
643 (European Bioinformatics Institute), Daniel Mead (Wellcome Trust Sanger Institute), Farzin  
644 Pourfarzad (Sanquin Research and Landsteiner Laboratory), Adriana Redensek (McGill  
645 University), Karola Rehnstrom (University of Cambridge), Augusto Rendon (University of  
646 Cambridge), David Richardson (European Bioinformatics Institute), Thomas Risch (Max Planck  
647 Institute for Molecular Genetics), Sophia Rowlston (University of Cambridge), Xiaojian Shao  
648 (McGill University), Marie-Michelle Simon (McGill University), Marc Sultan (Max Planck  
649 Institute for Molecular Genetics), Klaudia Walter (Wellcome Trust Sanger Institute), Steven P.  
650 Wilder (European Bioinformatics Institute), Ying Yan (Wellcome Trust Sanger Institute),  
651 Stylianos E. Antonarakis (University of Geneva), Guillaume Bourque (McGill University),  
652 Emmanouil T. Dermitzakis (University of Geneva), Paul Flicek (European Bioinformatics  
653 Institute), Hans Lehrach (Max Planck Institute for Molecular Genetics), Joost H. A. Martens  
654 (Radboud University), Marie-Laure Yaspo (Max Planck Institute for Molecular Genetics), Willem  
655 H. Ouwehand (University of Cambridge).

656

## 657 **References**

- 658 1. Yosef N, Regev A. Writ large: Genomic Dissection of the Effect of Cellular Environment on  
659 Immune Response. *Science*. 2016;354:64–8.
- 660 2. Elowitz MB, Levine AJ, Siggia ED, Swain PS. Stochastic Gene Expression in a Single Cell.  
661 *Science*. 2002;297:1183–6.
- 662 3. Lehner B, Kaneko K. Fluctuation and response in biology. *Cell Mol Life Sci*. 2011;68:1005–  
663 10.
- 664 4. Raser JM, O’Shea EK. Noise in Gene Expression: Origins, Consequences, and Control.  
665 *Science*. 2005;309:2010–3.

- 
- 666 5. Snijder B, Pelkmans L. Origins of regulated cell-to-cell variability. *Nat Rev Mol Cell Biol.*  
667 2011;12:119–25.
- 668 6. Blake WJ, Balázsi G, Kohanski MA, Isaacs FJ, Murphy KF, Kuang Y, et al. Phenotypic  
669 consequences of promoter-mediated transcriptional noise. *Mol Cell.* 2006;24:853–65.
- 670 7. Dong D, Shao X, Deng N, Zhang Z. Gene expression variations are predictive for stochastic  
671 noise. *Nucleic Acids Res.* 2011;39:403–13.
- 672 8. Alemu EY, Carl JW, Corrada Bravo H, Hannenhalli S. Determinants of expression variability.  
673 *Nucleic Acids Res.* 2014;42:3503–14.
- 674 9. Basehoar AD, Zanton SJ, Pugh BF. Identification and distinct regulation of yeast TATA box-  
675 containing genes. *Cell.* 2004;116:699–709.
- 676 10. Busslinger M, Tarakhovsky A. Epigenetic control of immunity. *Cold Spring Harb Perspect*  
677 *Biol.* 2014;6:a024174.
- 678 11. Paszek P, Ryan S, Ashall L, Sillitoe K, Harper C V, Spiller DG, et al. Population robustness  
679 arising from cellular heterogeneity. *Proc Natl Acad Sci U S A.* 2010;107:11644–9.
- 680 12. Feinberg AP, Irizarry RA. Stochastic epigenetic variation as a driving force of development,  
681 evolutionary adaptation, and disease. *Proc Natl Acad Sci U S A.* 2010;107:1757–64.
- 682 13. Pujadas E, Feinberg AP. Regulated noise in the epigenetic landscape of development and  
683 disease. *Cell.* 2012;148:1123–31.
- 684 14. Choi JK, Kim Y-J. Intrinsic variability of gene expression encoded in nucleosome  
685 positioning sequences. *Nat Genet.* 2009;41:498–503.
- 686 15. Brock A, Chang H, Huang S. Non-genetic heterogeneity--a mutation-independent driving  
687 force for the somatic evolution of tumours. *Nat Rev Genet.* 2009;10:336–42.

- 
- 688 16. Hansen KD, Timp W, Bravo HC, Sabunciyan S, Langmead B, Mcdonald OG, et al.  
689 Increased methylation variation in epigenetic domains across cancer types. *Nat Genet.*  
690 2011;43:768–75.
- 691 17. Landau DA, Clement K, Ziller MJ, Boyle P, Fan J, Gu H, et al. Locally Disordered  
692 Methylation Forms the Basis of Intratumor Methylation Variation in Chronic Lymphocytic  
693 Leukemia. *Cancer Cell.* 2014;26:813–25.
- 694 18. Li J, Liu Y, Kim T, Min R, Zhang Z. Gene expression variability within and between human  
695 populations and implications toward disease susceptibility. *PLoS Comput Biol.*  
696 2010;6:e1000910.
- 697 19. Mar JC, Matigian NA, Mackay-Sim A, Mellick GD, Sue CM, Silburn PA, et al. Variance of  
698 gene expression identifies altered network constraints in neurological disease. *PLoS Genet.*  
699 2011;7:e1002207.
- 700 20. Bravo HC, Pihur V, McCall M, Irizarry RA, Leek JT. Gene expression anti-profiles as a  
701 basis for accurate universal cancer signatures. *BMC Bioinformatics.* 2012;13:272.
- 702 21. Ecker S, Pancaldi V, Rico D, Valencia A. Higher gene expression variability in the more  
703 aggressive subtype of chronic lymphocytic leukemia. *Genome Med.* 2015;7:8.
- 704 22. Teschendorff AE, Jones A, Fiegl H, Sargent A, Zhuang JJ, Kitchener HC, et al. Epigenetic  
705 variability in cells of normal cytology is associated with the risk of future morphological  
706 transformation. *Genome Med.* 2012;4:24.
- 707 23. Teschendorff AE, Liu X, Caren H, Pollard SM, Beck S, Widschwendter M, et al. The  
708 Dynamics of DNA Methylation Covariation Patterns in Carcinogenesis. *PLoS Comput Biol.*  
709 2014;10:e1003709.
- 710 24. Chen L, Ge B, Casale FP, Vasquez L, Kwan T, Garrido-Martin D, et al. Genetic drivers of

- 
- 711 epigenetic and transcriptional variation in human immune cells. *Cell*. In press.
- 712 25. Geering B, Simon H-U. Peculiarities of cell death mechanisms in neutrophils. *Cell Death*  
713 *Differ*. 2011;18:1457–69.
- 714 26. Subrahmanyam YVBK, Yamaga S, Prashar Y, Lee HH, Hoe NP, Kluger Y, et al. RNA  
715 expression patterns change dramatically in human neutrophils exposed to bacteria. *Blood*.  
716 2001;97:2457–68.
- 717 27. Naranbhai V, Fairfax BP, Makino S, Humburg P, Wong D, Ng E, et al. Genomic modulators  
718 of gene expression in human neutrophils. *Nat Commun*. 2015;6:7545.
- 719 28. Young MD, Wakefield MJ, Smyth GK, Oshlack A. Gene ontology analysis for RNA-seq:  
720 accounting for selection bias. *Genome Biol*. 2010;11:R14.
- 721 29. Berditchevski F. Complexes of tetraspanins with integrins: more than meets the eye. *J Cell*  
722 *Sci*. 2001;114:4143–51.
- 723 30. Hemler ME. Tetraspanin functions and associated microdomains. *Nat Rev Mol Cell Biol*.  
724 2005;6:801–11.
- 725 31. Nuzzi P, Senetar M, Huttenlocher A. Asymmetric localization of calpain 2 during neutrophil  
726 chemotaxis. *Mol Biol Cell*. 2007;18:795–805.
- 727 32. Saito YD, Jensen AR, Salgia R, Posadas EM. Fyn: A novel molecular target in cancer.  
728 *Cancer*. 2010;116:1629–37.
- 729 33. GTEx Consortium. The Genotype-Tissue Expression (GTEx) pilot analysis: Multitissue gene  
730 regulation in humans. *Science*. 2015;348:648–60.
- 731 34. Gutierrez-Arcelus M, Ongen H, Lappalainen T, Montgomery SB, Buil A, Yurvsky A, et al.  
732 Tissue-Specific Effects of Genetic and Epigenetic Variation on Gene Regulation and Splicing.

- 733 PLoS Genet. 2015;11:e1004958.
- 734 35. Kilpinen H, Waszak SM, Gschwind AR, Raghav SK, Witwicki RM, Orioli A, et al.  
735 Coordinated effects of sequence variation on DNA binding, chromatin structure, and  
736 transcription. *Science*. 2013;342:744–7.
- 737 36. Song Z, Krishna S, Thanos D, Strominger J, Ono S. A novel cysteine-rich sequence-specific  
738 DNA-binding protein interacts with the conserved X-box motif of the human major  
739 histocompatibility complex class II genes via a repeated Cys-His domain and functions as a  
740 transcriptional repressor. *J Exp Med*. 1994;180:1763–74.
- 741 37. Schneider WM, Dittmann Chevillotte M, Rice CM. Interferon-Stimulated Genes: A Complex  
742 Web of Host Defenses. *Annu Rev Immunol*. 2014;32:513–45.
- 743 38. Fairweather D, Frisancho-Kiss S, Rose NR. Sex differences in autoimmune disease from a  
744 pathological perspective. *Am J Pathol*. 2008;173:600–9.
- 745 39. Roadmap Epigenomics Consortium. Integrative analysis of 111 reference human  
746 epigenomes. *Nature*. 2015;518:317–30.
- 747 40. Ernst J, Kellis M. Discovery and characterization of chromatin states for systematic  
748 annotation of the human genome. *Nat Biotechnol*. 2010;28:817–25.
- 749 41. Ernst J, Kellis M. ChromHMM: automating chromatin-state discovery and characterization.  
750 *Nat Methods*. 2012;9:215–6.
- 751 42. McLean CY, Bristor D, Hiller M, Clarke SL, Schaar BT, Lowe CB, et al. GREAT improves  
752 functional interpretation of cis-regulatory regions. *Nat Biotechnol*. 2010;28:495–501.
- 753 43. Dröge W, Holm E. Role of cysteine and glutathione in HIV infection and other diseases  
754 associated with muscle wasting and immunological dysfunction. *FASEB J*. 1997;11:1077–89.

- 755 44. Harburger DS, Calderwood DA. Integrin signalling at a glance. *J Cell Sci.* 2009;122:159–63.
- 756 45. Miranti CK, Brugge JS. Sensing the environment: a historical perspective on integrin signal  
757 transduction. *Nat Cell Biol.* 2002;4:E83-90.
- 758 46. Dopico XC, Evangelou M, Ferreira RC, Guo H, Pekalski ML, Smyth DJ, et al. Widespread  
759 seasonal gene expression reveals annual differences in human immunity and physiology. *Nat*  
760 *Commun.* 2015;6:7000.
- 761 47. Golbus J, Palellan TD, A BCR, Arbor A. Quantitative changes in T cell. *Eur J Immunol.*  
762 1990;20:1869–72.
- 763 48. Heyn H, Vidal E, Ferreira HJ, Vizoso M, Sayols S, Gomez A, et al. Epigenomic analysis  
764 detects aberrant super-enhancer DNA methylation in human cancer. *Genome Biol.* 2016;17:11.
- 765 49. Maue AC, Yager EJ, Swain SL, Woodland DL, Blackman MA, Haynes L. T-cell  
766 immunosenescence: lessons learned from mouse models of aging. *Trends Immunol.*  
767 2009;30:301–5.
- 768 50. Weng N. Aging of the Immune System: How Much Can the Adaptive Immune System  
769 Adapt? *Immunity.* 2006;24:495–9.
- 770 51. Tsukamoto H, Clise-Dwyer K, Huston GE, Duso DK, Buck AL, Johnson LL, et al. Age-  
771 associated increase in lifespan of naive CD4 T cells contributes to T-cell homeostasis but  
772 facilitates development of functional defects. *Proc Natl Acad Sci U S A.* 2009;106:18333–8.
- 773 52. Jones PA. Functions of DNA methylation: islands, start sites, gene bodies and beyond. *Nat*  
774 *Rev Genet.* 2012;13:484–92.
- 775 53. Gallant S, Gilkeson G. ETS transcription factors and regulation of immunity. *Arch Immunol*  
776 *Ther Exp.* 2006;54:149–63.



- 777 54. Amulic B, Cazalet C, Hayes GL, Metzler KD, Zychlinsky A. Neutrophil Function: From  
778 Mechanisms to Disease. *Annu Rev Immunol.* 2012;30:459–89.
- 779 55. Kolaczowska E, Kubes P. Neutrophil recruitment and function in health and inflammation.  
780 *Nat Rev Immunol.* 2013;13:159–75.
- 781 56. Silvestre-Roig C, Hidalgo A, Soehnlein O. Neutrophil heterogeneity: implications for  
782 homeostasis and pathogenesis. *Blood.* 2016;127:2173–81.
- 783 57. Angermueller C, Clark SJ, Lee HJ, Macaulay IC, Teng MJ, Hu TX, et al. Parallel single-cell  
784 sequencing links transcriptional and epigenetic heterogeneity. *Nat Methods.* 2016;13:229–32.
- 785 58. Buettner F, Natarajan KN, Casale FP, Proserpio V, Scialdone A, Theis FJ, et al.  
786 Computational analysis of cell-to-cell heterogeneity in single-cell RNA-sequencing data reveals  
787 hidden subpopulations of cells. *Nat Biotechnol.* 2015;33:155–60.
- 788 59. Farlik M, Sheffield NC, Nuzzo A, Datlinger P, Schönegger A, Klughammer J, et al. Single-  
789 Cell DNA Methylome Sequencing and Bioinformatic Inference of Epigenomic Cell-State  
790 Dynamics. *Cell Rep.* 2015;10:1386–97.
- 791 60. BLUEPRINT WP10 data portal: Hypervariability. 2016. [http://blueprint-  
dev.bioinfo.cnio.es/WP10/hypervariability](http://blueprint-<br/>792 dev.bioinfo.cnio.es/WP10/hypervariability). Accessed 7 Oct 2016.
- 793 61. Fairfax BP, Humburg P, Makino S, Naranbhai V, Wong D, Lau E, et al. Innate Immune  
794 Activity Conditions the Effect of Regulatory Variants upon Monocyte Gene Expression. *Science.*  
795 2014;343:1246949.
- 796 62. The Cambridge NIHR BioResource. 2016. <http://www.cambridgebioresource.org.uk>.  
797 Accessed 7 Oct 2016.
- 798 63. Andrews S. FastQC A Quality Control tool for High Throughput Sequence Data. 2014.  
799 <http://www.bioinformatics.babraham.ac.uk/projects/fastqc/>. Accessed 26 Jun 2015.

- 
- 800 64. Dobin A, Davis CA, Schlesinger F, Drenkow J, Zaleski C, Jha S, et al. STAR: Ultrafast  
801 universal RNA-seq aligner. *Bioinformatics*. 2013;29:15–21.
- 802 65. Love MI, Huber W, Anders S. Moderated estimation of fold change and dispersion for RNA-  
803 Seq data with DESeq2. *Genome Biol*. 2014;15:550.
- 804 66. Johnson WE, Li C, Rabinovic A. Adjusting batch effects in microarray expression data using  
805 empirical Bayes methods. *Biostatistics*. 2007;8:118–27.
- 806 67. Aryee MJ, Jaffe AE, Corrada-Bravo H, Ladd-Acosta C, Feinberg AP, Hansen KD, et al.  
807 Minfi: a flexible and comprehensive Bioconductor package for the analysis of Infinium DNA  
808 methylation microarrays. *Bioinformatics*. 2014;30:1363–9.
- 809 68. Triche TJ, Weisenberger DJ, Van Den Berg D, Laird PW, Siegmund KD. Low-level  
810 processing of Illumina Infinium DNA Methylation BeadArrays. *Nucleic Acids Res*.  
811 2013;41:e90.
- 812 69. Makismovic J, Gordon L, Oshlack A. SWAN: Subset-quantile Within Array Normalization  
813 for Illumina Infinium HumanMethylation450 BeadChips. *Genome Biol*. 2012;13:R44.
- 814 70. Nordlund J, Bäcklin CL, Wahlberg P, Busche S, Berglund EC, Eloranta M-L, et al. Genome-  
815 wide signatures of differential DNA methylation in pediatric acute lymphoblastic leukemia.  
816 *Genome Biol*. 2013;14:r105.
- 817 71. Leek JT, Johnson WE, Parker HS, Jaffe AE, Storey JD. The SVA package for removing  
818 batch effects and other unwanted variation in high-throughput experiments. *Bioinformatics*.  
819 2012;28:882–3.
- 820 72. Phipson B, Oshlack A. DiffVar: a new method for detecting differential variability with  
821 application to methylation in cancer and aging. *Genome Biol*. 2014;15:465.
- 822 73. Ritchie ME, Phipson B, Wu D, Hu Y, Law CW, Shi W, et al. limma powers differential

- 823 expression analyses for RNA-sequencing and microarray studies. *Nucleic Acids Res.*  
824 2015;43:e47.
- 825 74. Smyth GK. Limma: Linear Models for Microarray Data. In: Gentleman R, Carey V, Dudoit  
826 S, Irizarry R, Huber W, editors. *Bioinformatics and computational biology solutions using R and*  
827 *Bioconductor*. New York: Springer; 2005. p. 397–420.
- 828 75. Benjamini Y, Hochberg Y. Controlling the False Discovery Rate: A Practical and Powerful  
829 Approach to Multiple Testing. *J R Stat Soc Ser B Stat Methodol.* 1995;289–300.
- 830 76. Shannon P, Markiel A, Ozier O, Baliga NS, Wang JT, Ramage D, et al. Cytoscape: A  
831 Software Environment for Integrated Models of Biomolecular Interaction Networks. *Genome*  
832 *Res.* 2003;13:2498–504.
- 833 77. Li M, Wang J, Chen J. A fast agglomerate algorithm for mining functional modules in  
834 protein interaction networks. *BioMedical Engineering and Informatics.* 2008. p. 3–7.
- 835 78. Bindea G, Mlecnik B, Hackl H, Charoentong P, Tosolini M, Kirilovsky A, et al. ClueGO: a  
836 Cytoscape plug-in to decipher functionally grouped gene ontology and pathway annotation  
837 networks. *Bioinformatics.* 2009;25:1091–3.
- 838 79. Bastian M, Heymann S, Jacomy M. Gephi: an open source software for exploring and  
839 manipulating networks. *Int AAAI Conf.* 2009;
- 840 80. National Climatic Data Center (NCDC). 2016. <http://www.ncdc.noaa.gov/cdo-web/search>.  
841 Accessed 8 Apr 2016.
- 842 81. Timeanddate.com. 2016. <http://www.timeanddate.com>. Accessed 8 Apr 2016.
- 843 82. Mathelier A, Zhao X, Zhang AW, Parcy F, Worsley-Hunt R, Arenillas DJ, et al. JASPAR  
844 2014: An extensively expanded and updated open-access database of transcription factor binding  
845 profiles. *Nucleic Acids Res.* 2014;42:D142-7.

- 846 83. Grant CE, Bailey TL, Noble WS. FIMO: Scanning for occurrences of a given motif.  
847 *Bioinformatics*. 2011;27:1017–8.
- 848 84. Gentleman RC, Carey VJ, Bates DM, Bolstad B, Dettling M, Dudoit S, et al. Bioconductor:  
849 open software development for computational biology and bioinformatics. *Genome Biol*.  
850 2004;5:R80.
- 851 85. European Genome-phenome Archive. 2016. <https://www.ebi.ac.uk/ega/>. Accessed 7 Oct  
852 2016.

853

## 854 **FIGURE LEGENDS**

### 855 **Figure 1. Differential variability of gene expression and DNA methylation across three** 856 **immune cell types**

857 (A) Study design and analytical approach. Hypervariable genes and CpGs were identified using a  
858 combined statistical approach at stringent significance thresholds, i.e. Benjamini-Hochberg (BH)-  
859 corrected  $P < 0.05$  and gene expression/DNA methylation variability measurement (EV/MV)  
860 difference  $\geq 10\%$  relative to the observed range.

861 (B) Barplots showing the number of statistically significant hypervariable genes (HVGs) that are  
862 cell type-specific, shared between two, or common to all three of the studied immune cell types.

863 (C) Scatter plot of the EV-values of 6,138 genes assessed in our data set versus the replication set.  
864 We found good concordance between the two independent cohorts, despite the application of  
865 different analytical platforms (Pearson's  $r = 0.48$ ,  $P < 2.2 \times 10^{-16}$ ).

866 (D) Ranking of all 11,980 protein-coding genes analyzed in our study according to EV-values (i.e.  
867 from high to low EV-values). We highlight the 100 genes that showed the highest and lowest EV-  
868 values in the independent replication data set in red and blue, respectively.

869 (E) Barplots showing the number of hypervariable CpG positions (HVPs).

870 *Abbreviations: M=monocytes, N=neutrophils, T=naïve T cells.*

871

872 **Figure 2. Characterization of cell type-specific hypervariable genes**

873 (A–C) Increased expression variability of the genes *CD9*, *CAPN2*, and *FYN* across three immune  
874 cell types. For each cell type, data points represent the expression values of the indicated gene in  
875 one individual. Cell types marked by an arrow were found to show significantly increased  
876 variability compared to the other two cell types. While *CD9* was found to be hypervariable in all  
877 three cell types, *CAPN2* and *FYN* show increased variability only in neutrophils, if contrasted to  
878 monocytes and T cells.

879 (D) Heatmap of Spearman’s correlation coefficients showing neutrophil-specific HVGs that  
880 associated with various donor-specific quantitative traits. A total of 49 genes with increased inter-  
881 individual variability showed a significant association with at least one of the measured traits (BH-  
882 corrected  $P < 0.05$ , Spearman’s rank correlation).

883 (E) Scatter plot of *NFX1* gene expression levels versus neutrophil granularity.

884 (F) Scatter plot of *FYN* gene expression levels versus neutrophil percentage.

885

886 **Figure 3. Gene network and pathway analysis of neutrophil-specific HVGs not mediated by**  
887 ***cis* genetic effects**

888 Co-expression network of neutrophil-specific HVGs that did not correlate with genetic variants in  
889 *cis*, as reported in the BLUEPRINT Human Variation Panel. We identified three gene modules,  
890 shown in green, yellow, and red. These modules were highly enriched for important biological  
891 functions in immune cells (Table S4). Nodes represent genes, and edges represent correlations in  
892 these genes’ expression values. Node sizes are determined by expression variability of the  
893 corresponding gene, with bigger nodes indicating higher EV-values. Nodes colored in gray belong  
894 to several smaller gene clusters connecting the three main clusters of the network.

895

896 **Figure 4. Functional annotation of neutrophil-specific hypervariable CpG positions**

897 (A) Enrichment of neutrophil-specific HVPs (n=261) at genomic features. We found neutrophil-  
898 specific HVPs to be depleted at CpG islands ( $P = 6.37 \times 10^{-19}$ , hypergeometric test).

899 (B) Enrichment of neutrophil-specific HVPs at gene elements. Neutrophil-specific HVPs were  
900 enriched at intergenic regions ( $P = 0.03$ ).

901 (C) Enrichment of neutrophil-specific HVPs at distinct reference chromatin states in neutrophils.  
902 The HVPs were enriched at enhancer ( $P = 1.32 \times 10^{-12}$ ) and ‘variable’ ( $P = 3.81 \times 10^{-8}$ ) chromatin  
903 states. A ‘variable’ chromatin state denotes a state that was observed in less than 80% of the  
904 biological replicates ( $n \geq 5$ ) within a given cell type, and indicates dynamic changes of local  
905 chromatin structure.

906 (D) Regional plot of an exemplar neutrophil-specific HVP mapping to the promoter of the  
907 *ITGB1BP1* gene, encoding the integrin beta 1 binding protein 1. The statistically significant HVP  
908 is indicated with an arrow. For each cell type, data points represent the DNA methylation  $\beta$ -values  
909 (y-axis) at the indicated CpGs (x-axis) in one individual. For each CpG site, we calculated the  
910 mean DNA methylation value (indicated with a larger data point). Every CpG site is annotated  
911 with regards to genomic feature, gene element, and chromatin state.

912 *Abbreviations: M=monocytes, N=neutrophils, T=naïve T cells, TSS=transcription start site,*  
913 *CGI=CpG island, UTR=untranslated region, prom=promoter.*

914

915 **Figure 5. Relationship between DNA methylation and gene expression**

916 (A) Barplots showing the proportion of cell type-specific HVPs that map to gene promoters and  
917 are positively (red), negatively (blue), or not (white) associated with gene expression levels at BH-  
918 corrected  $P < 0.05$  (Spearman’s rank correlation). We found that around one third of these HVPs  
919 (30.1%; range 23.5–33.3%) is negatively correlated with gene expression.

920 (B) Barplots as shown in panel (A) but for HVPs that map to gene bodies.

921 (C) Scatter plot showing the negative correlation of *MSRI* promoter DNA methylation with gene  
922 expression in monocytes ( $r = -0.70$ ,  $P < 2.2 \times 10^{-16}$ ; Spearman's rank correlation).

923 (D) Correlation between DNA methylation variability and gene expression variability at gene  
924 promoters in neutrophils. First, gene-wise MV-values were calculated. Then, the values were  
925 ordered from low to high MV-value, grouped together in bins of 100 genes, and plotted against  
926 the EV-values, maintaining the ordering by MV-values. This binning strategy was applied to  
927 reduce the complexity of the data. HVPs at gene promoters were defined as CpG sites annotated  
928 to TSS1500, TSS200, 5'UTR, and first exon, according to the Illumina 450K array annotation  
929 manifest. Darker data points indicate the subset of bins that is further discussed in the Results  
930 section.

931 (E) Same scatter plot as shown in panel (D) but for HVPs that map to gene bodies. HVPs at gene  
932 bodies were defined as CpGs annotated to body and 3'UTR, according to the 450K array  
933 annotation manifest.

934 (F) Scatter plot of the number of consensus transcription factor binding motifs at promoter regions  
935 versus MV-values in neutrophils. Promoter regions were defined as  $\pm 500$  bp around the  
936 transcription start site. Darker data points indicate the subset of bins that is further discussed in the  
937 Results section.

938 *Abbreviations: MV=DNA methylation variability, TF=transcription factor.*

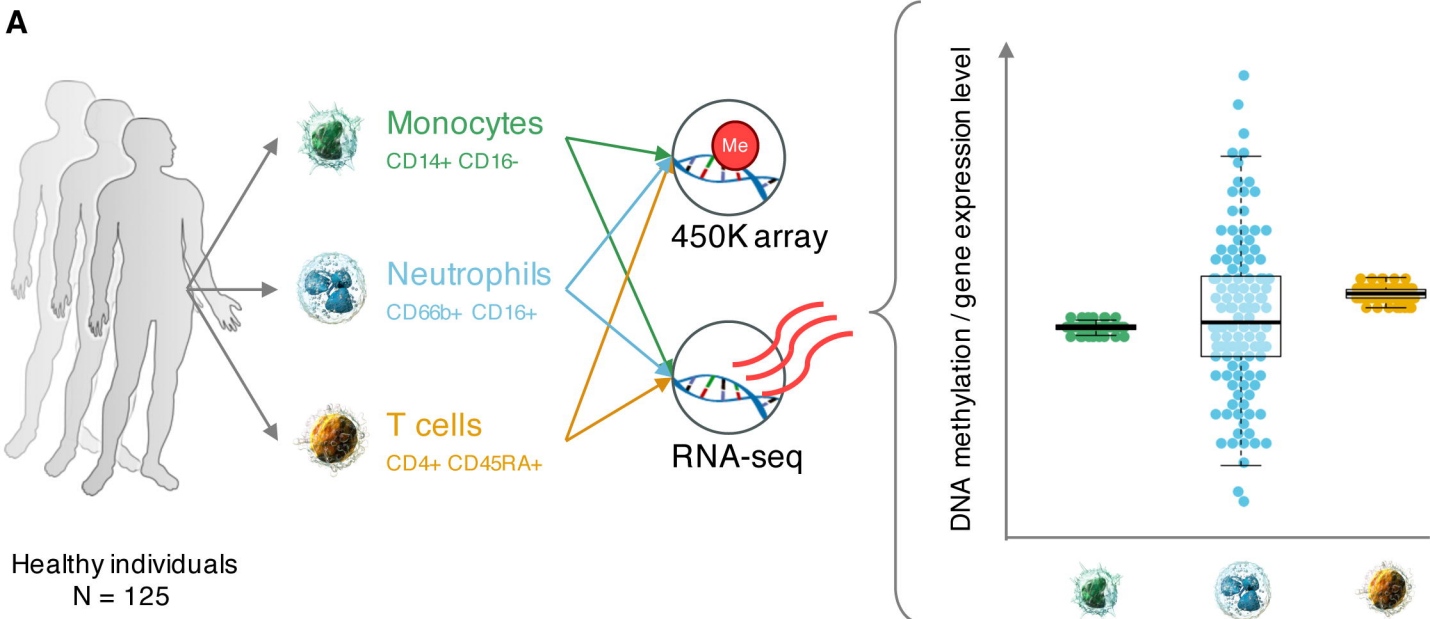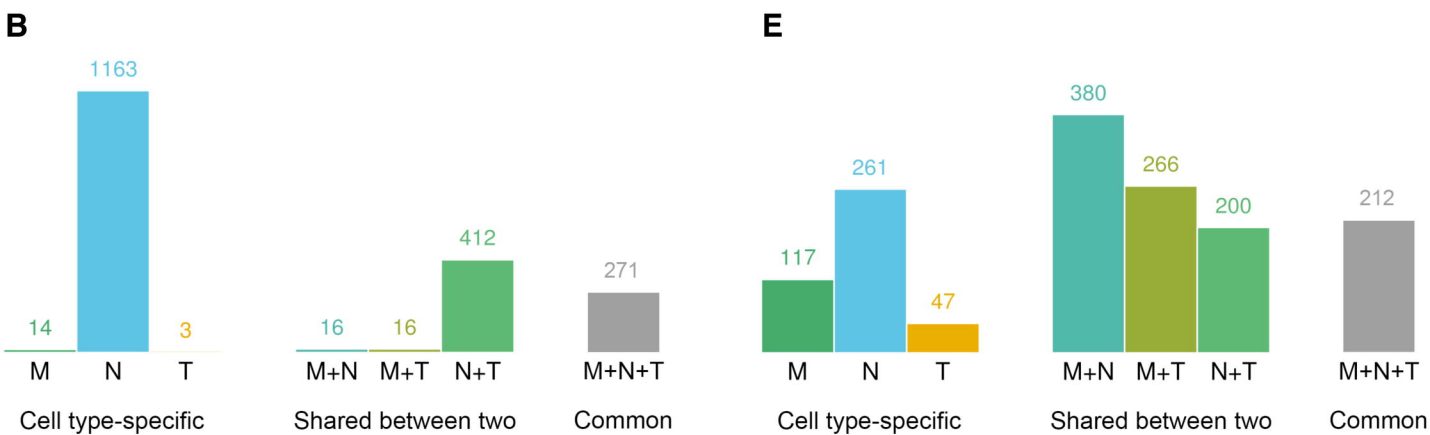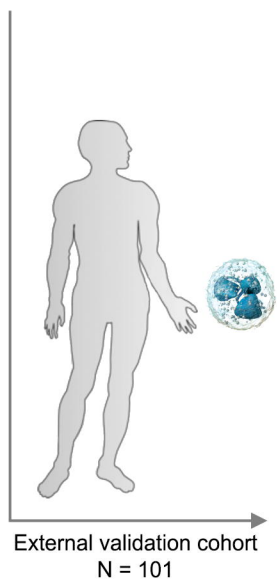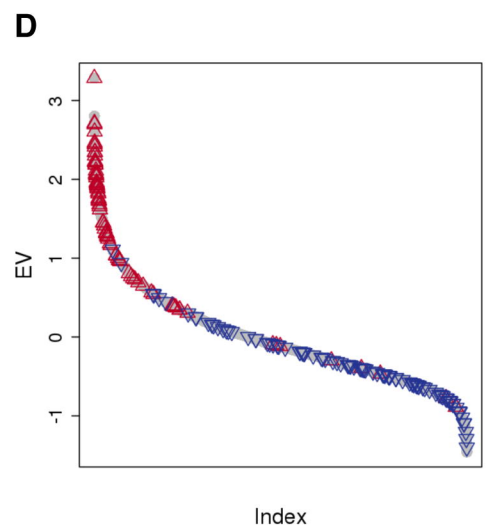



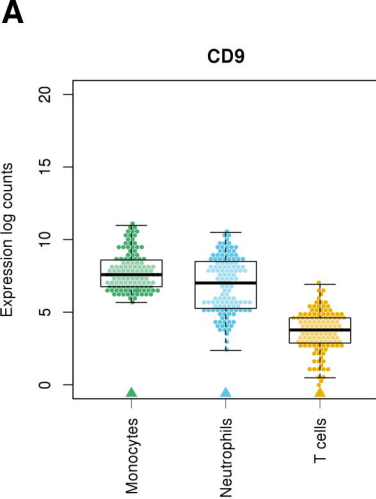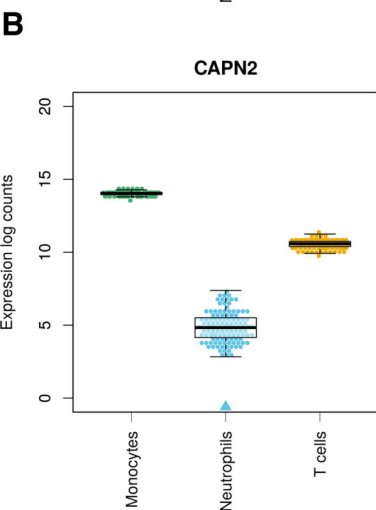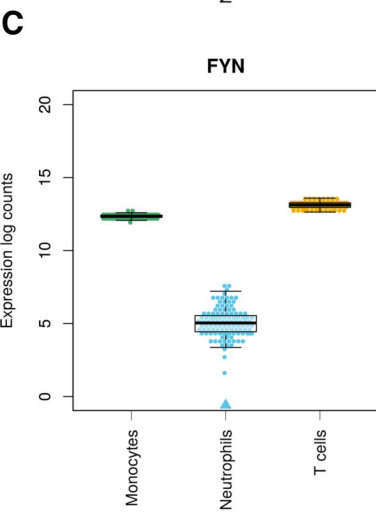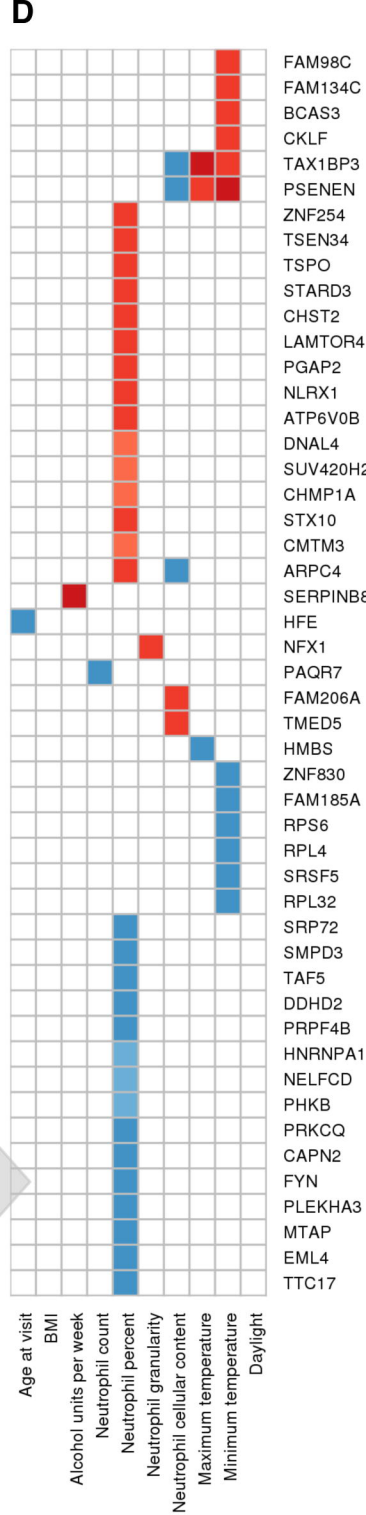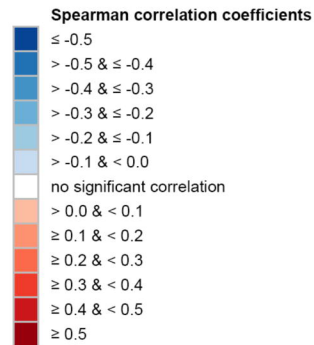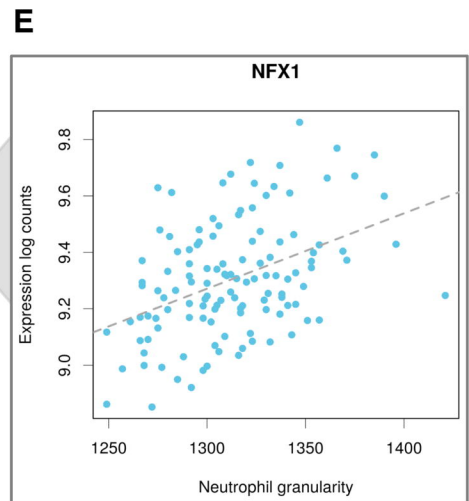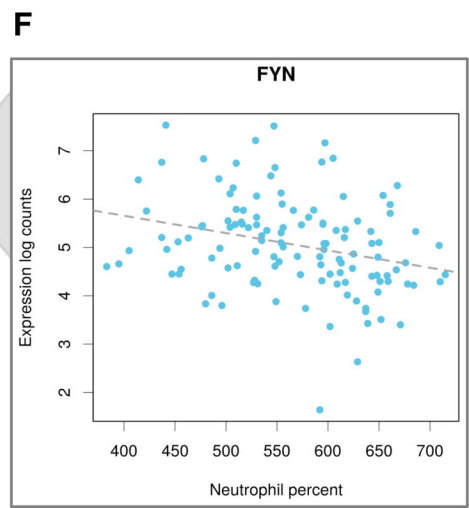



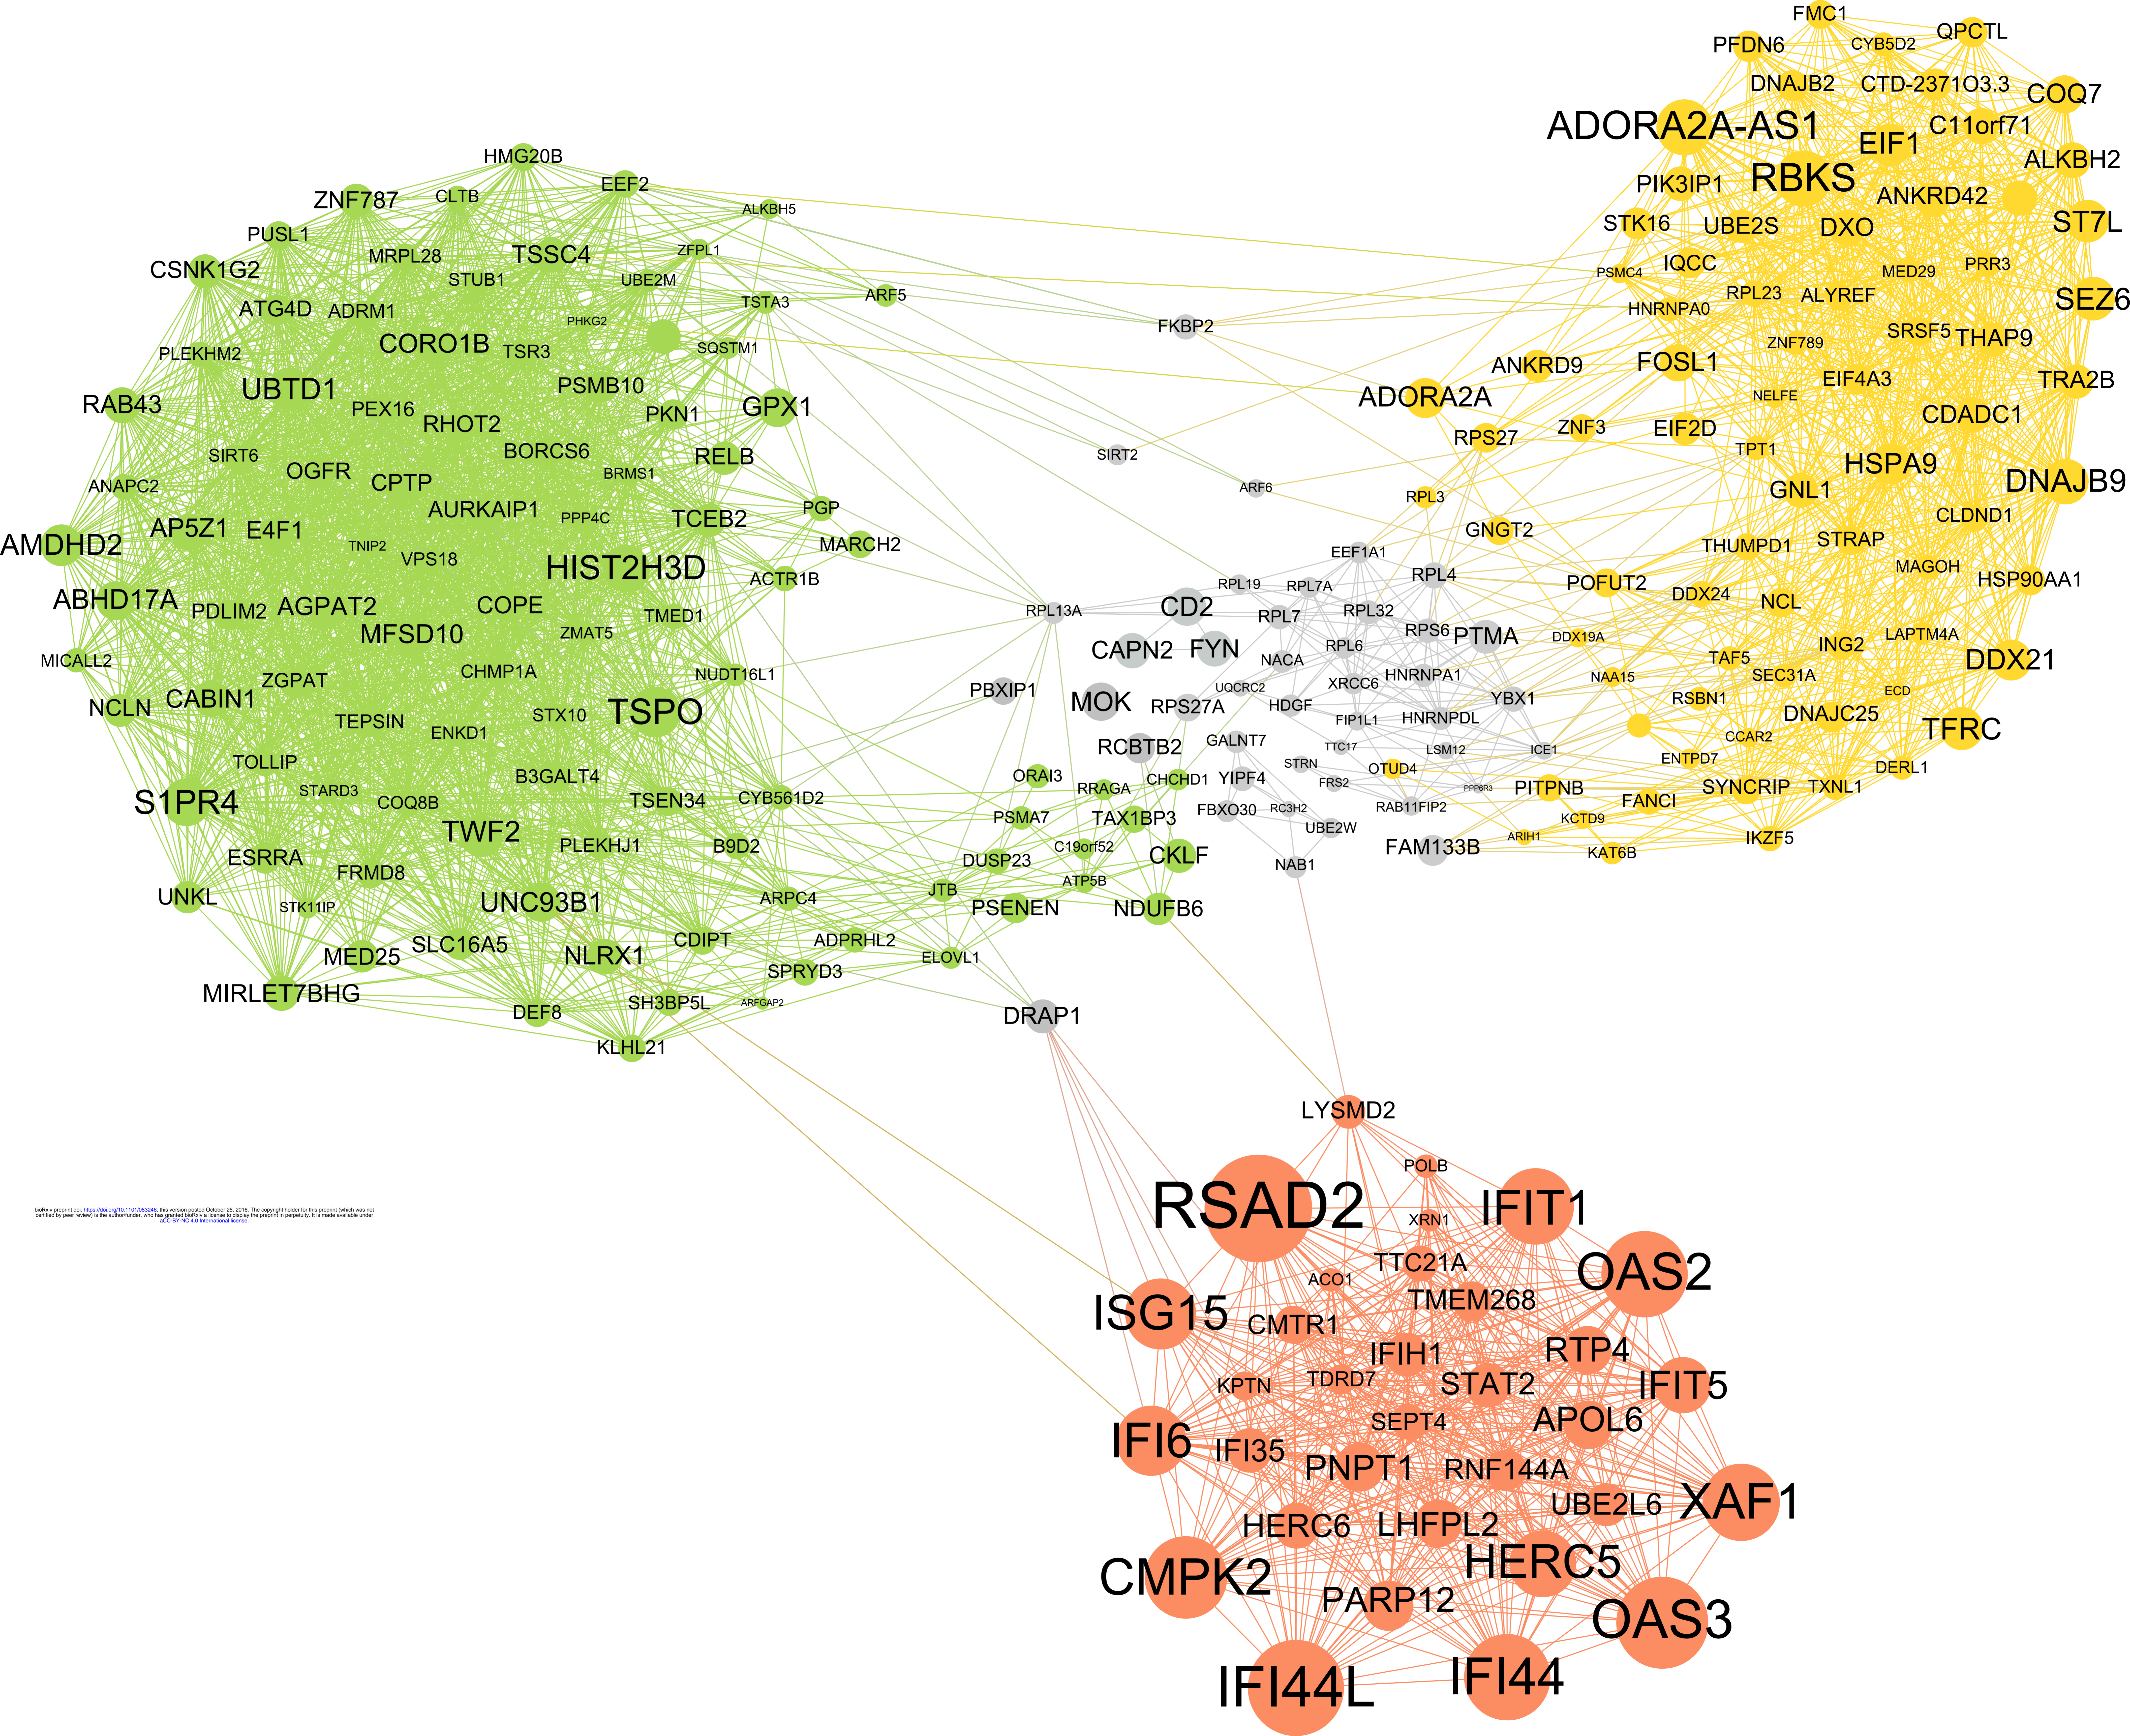



**A**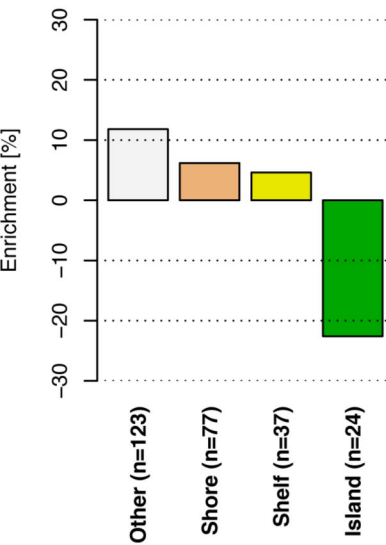**B**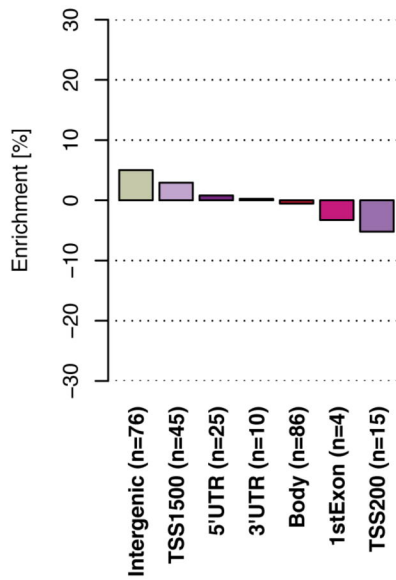**C**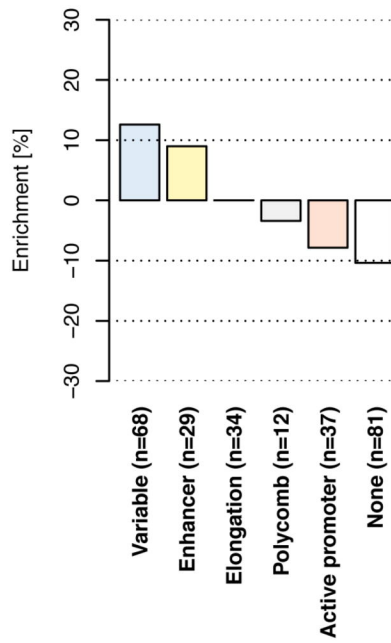**D**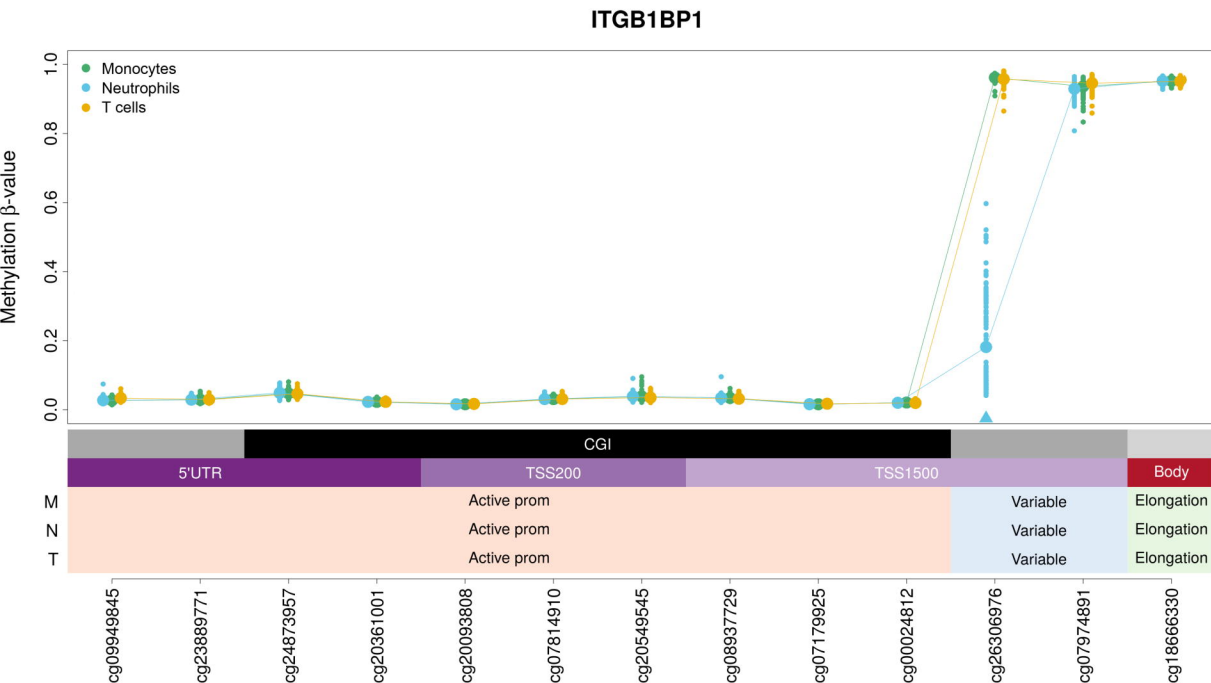

**A**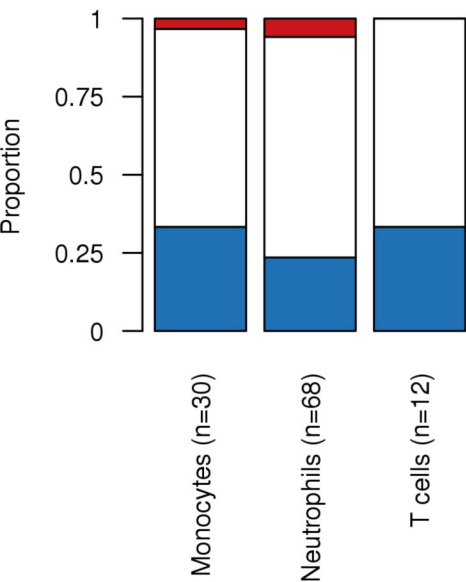**B**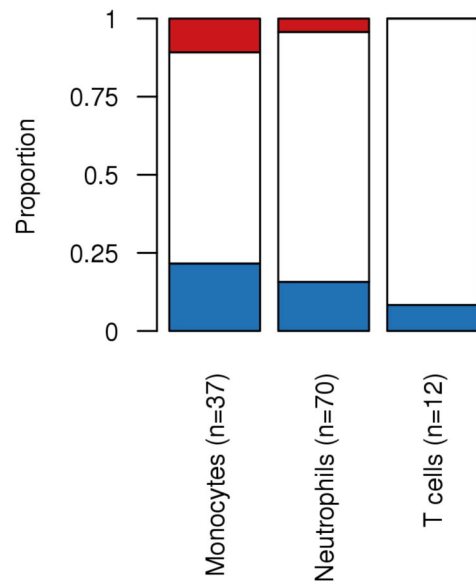**C**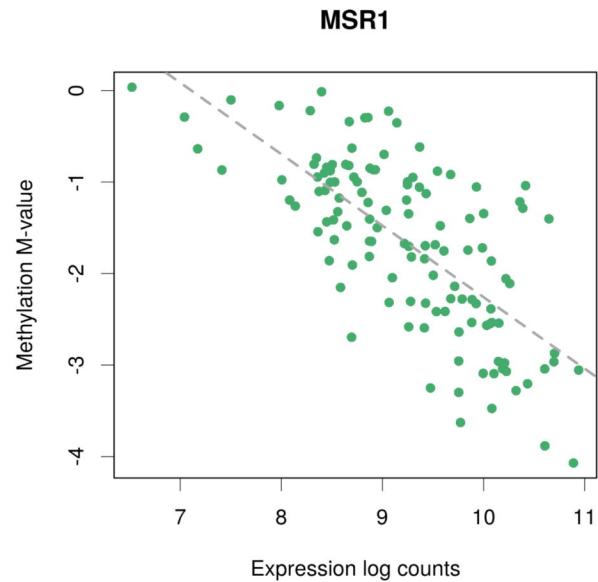**D**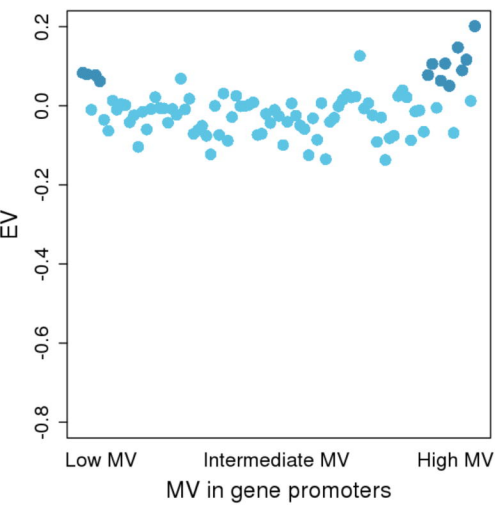**E**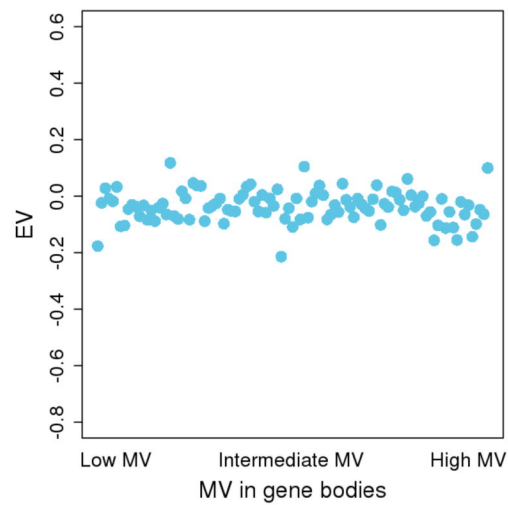**F**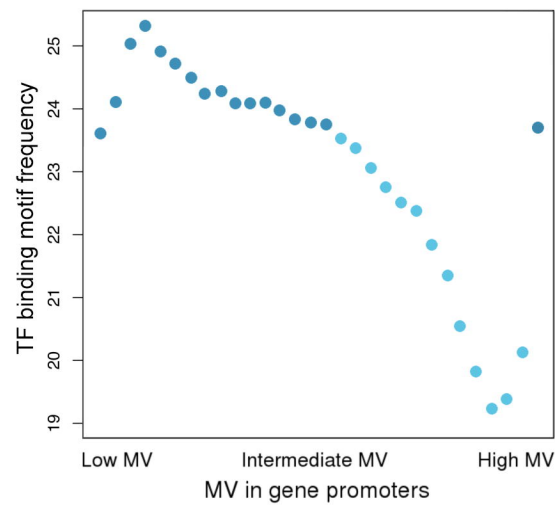

Source: http://biorxiv.org/content/10.1101/083246v1.full.pdf
